# Supplementary material for: Characterization of Immunogenicity of Malignant Cells with Stemness in Intrahepatic Cholangiocarcinoma by Single-Cell RNA Sequencing
Source: Hindawi journal article supplement (doi:10.1155/2022/3558200), 2022-04-29

Supplemental Figure S1

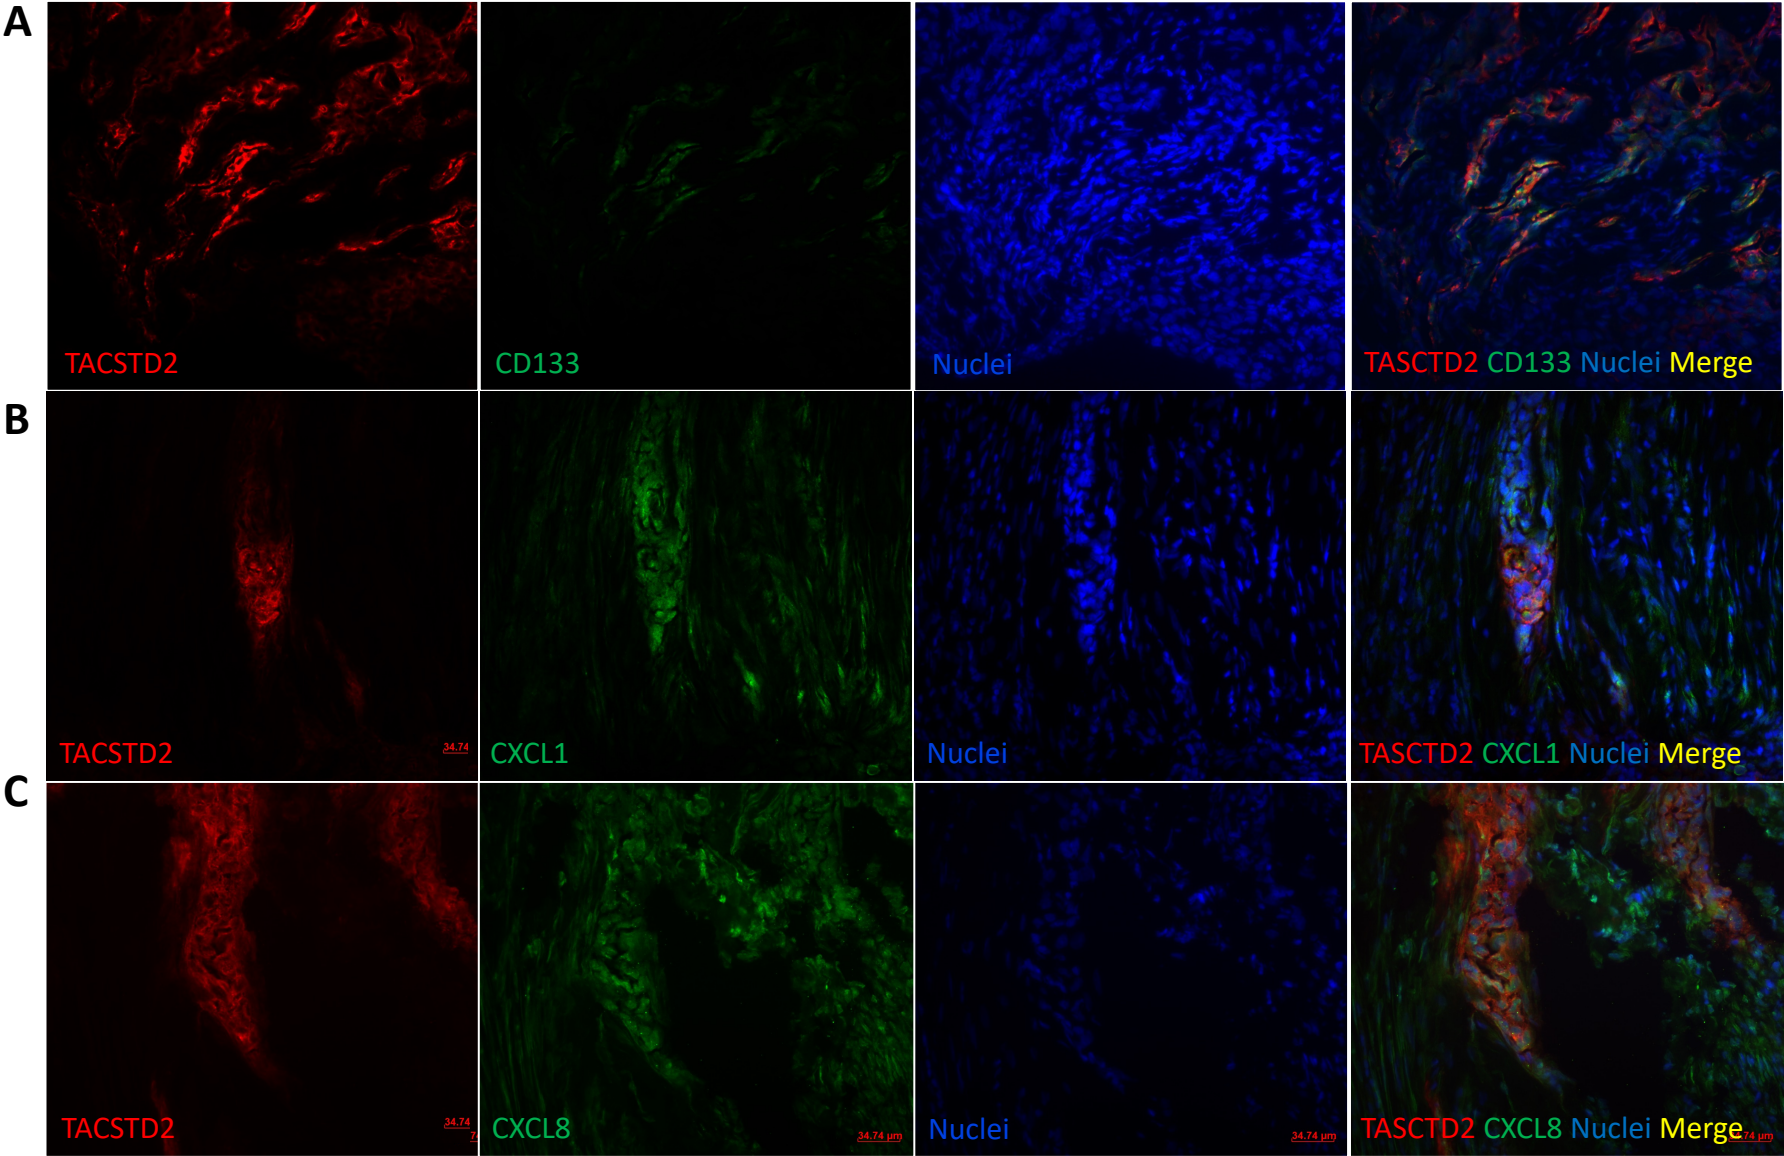

Supplemental Figure S2

S2A

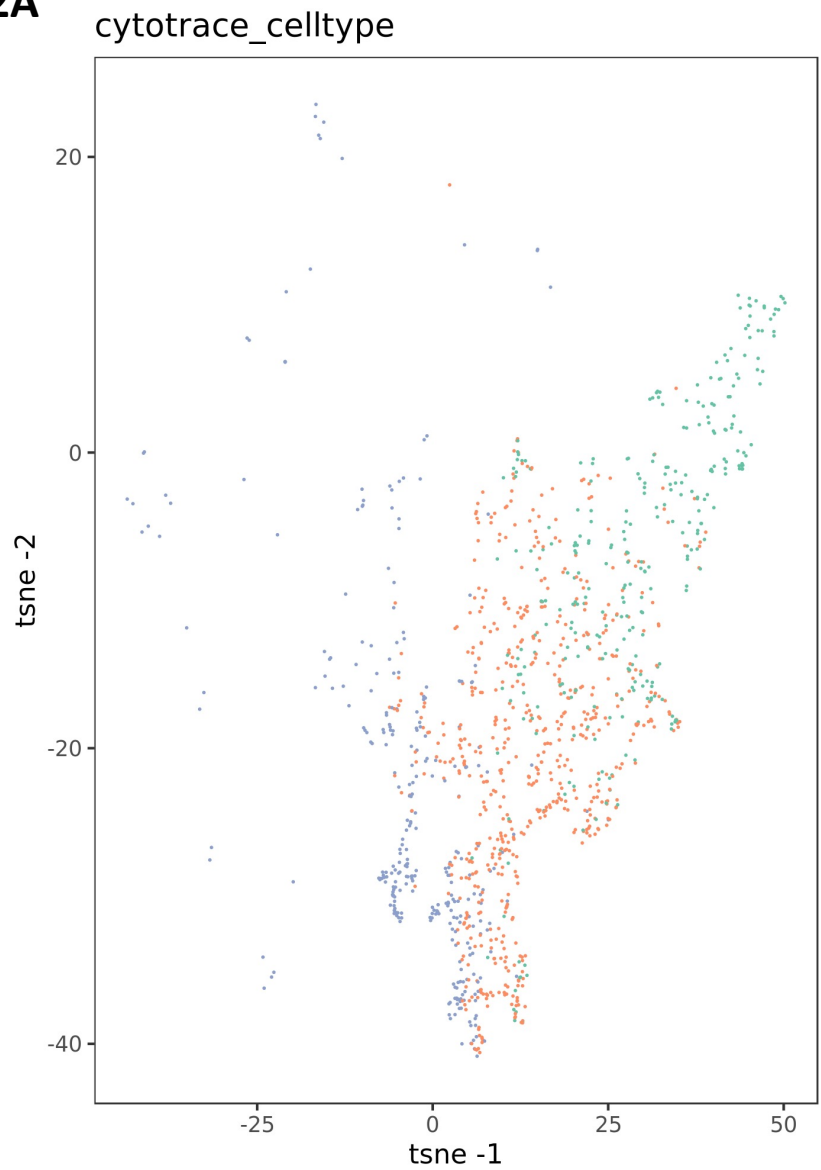

S2B

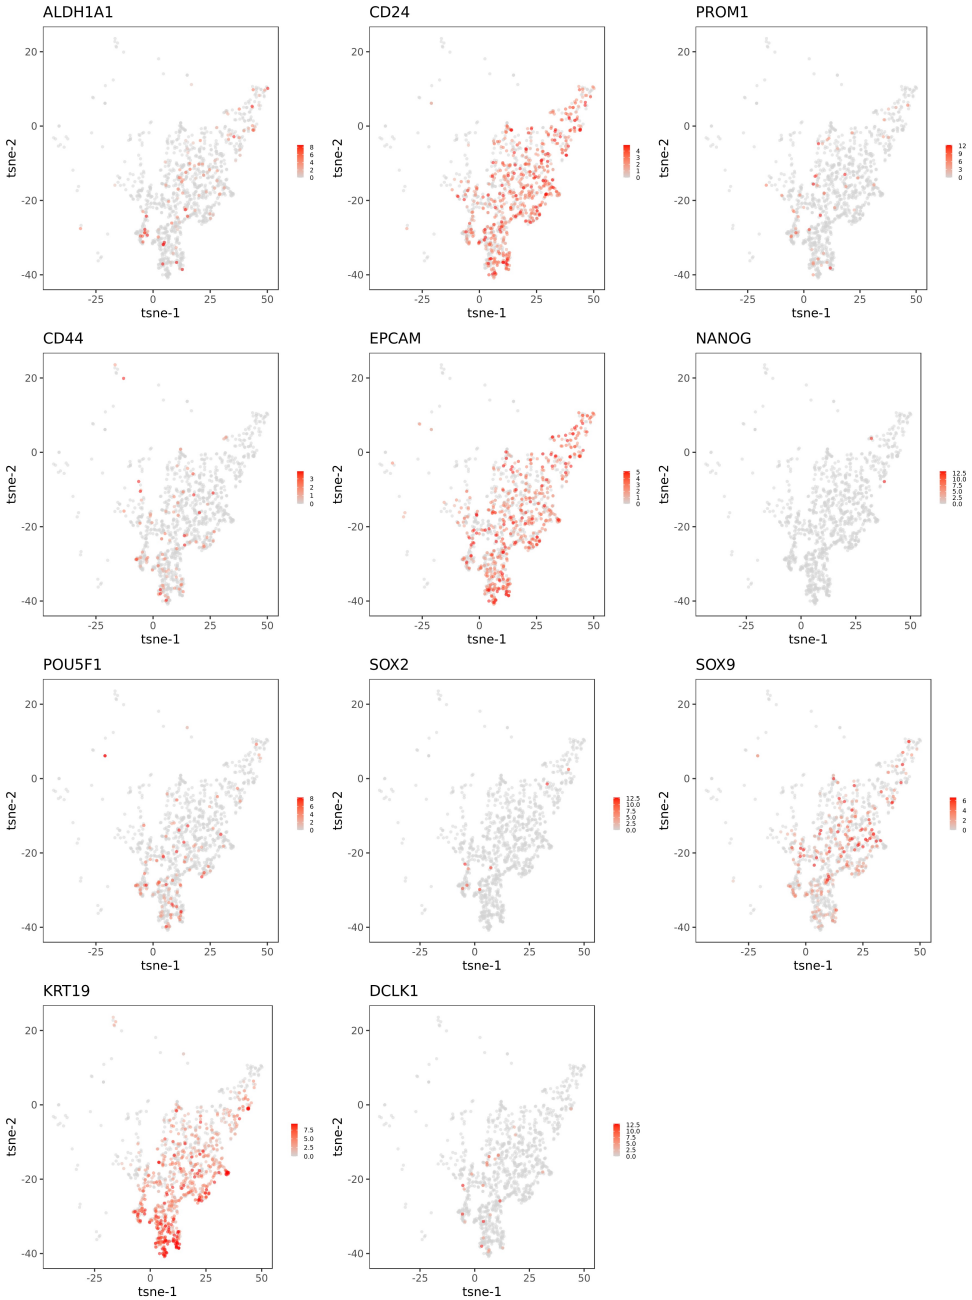

Supplemental Figure S2

S2C

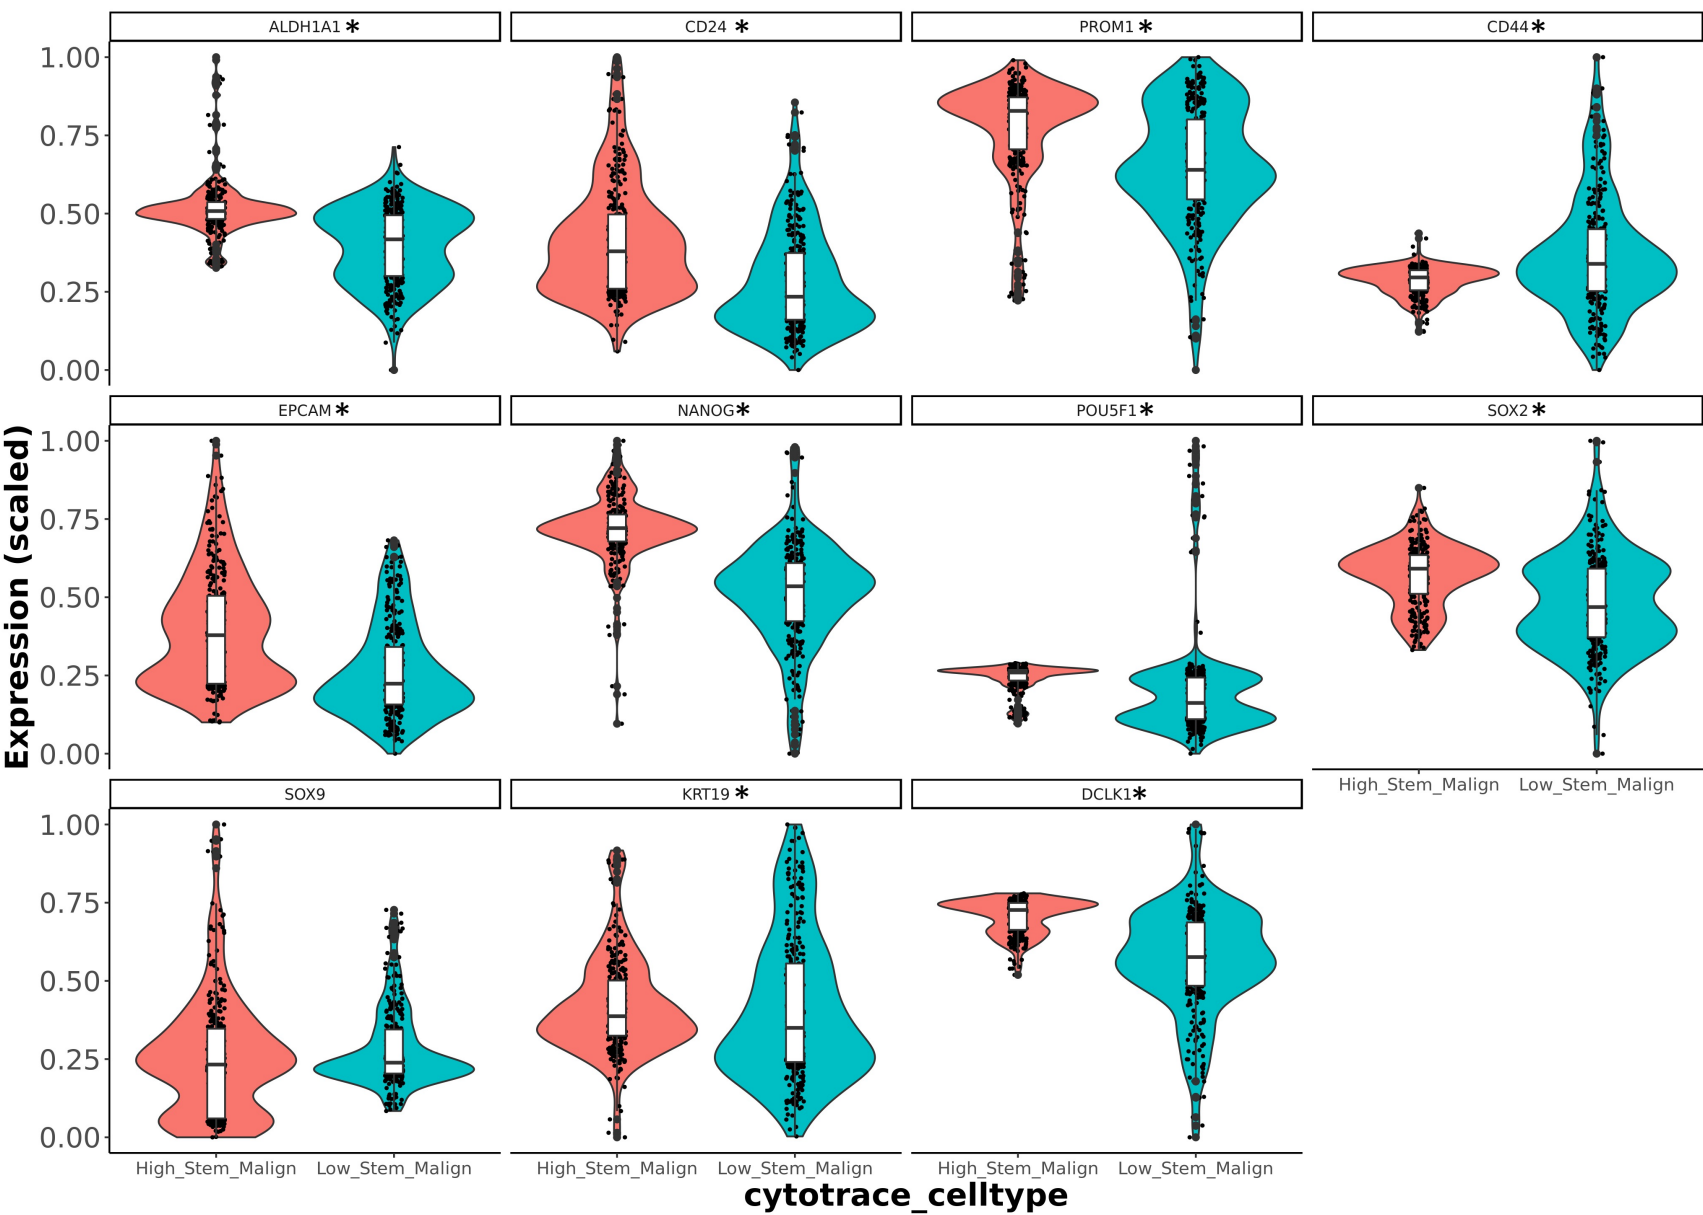

Supplemental Figure S3

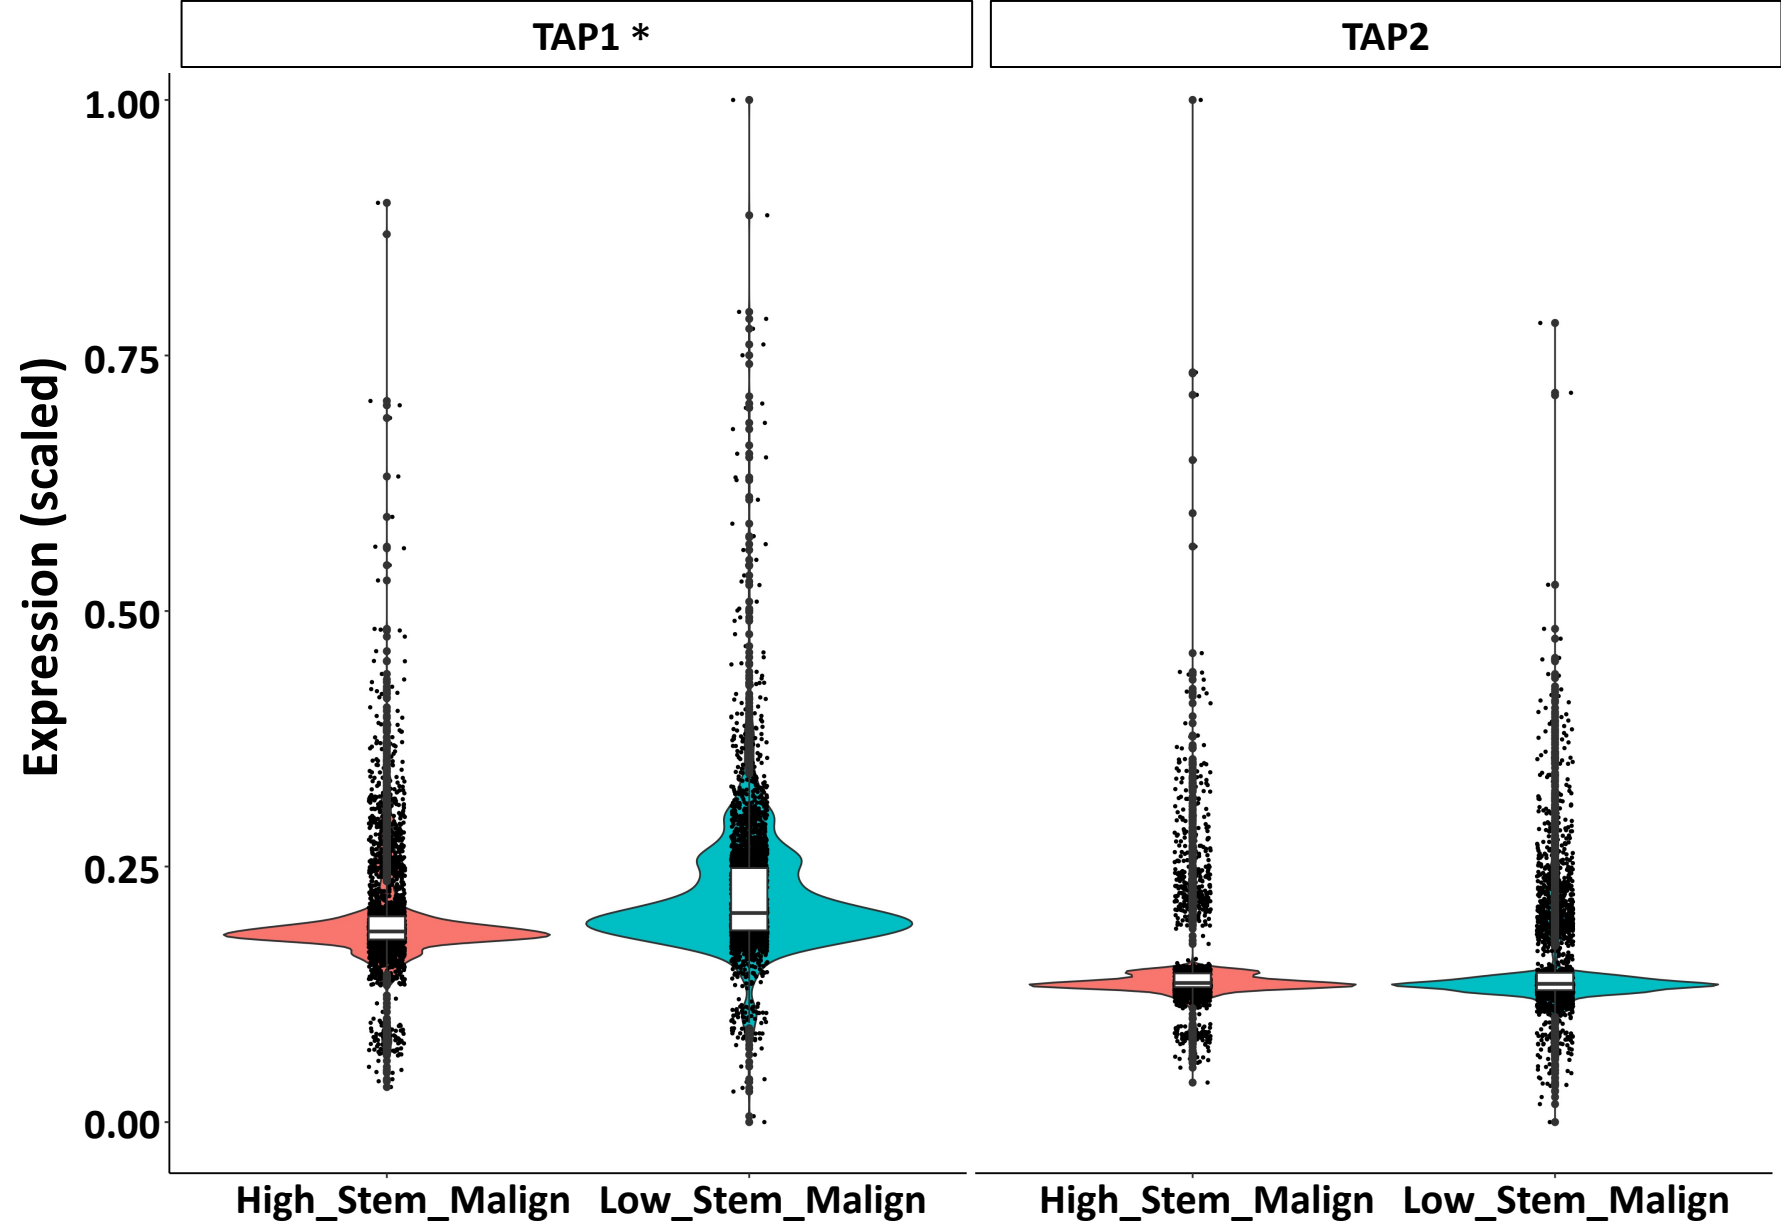



Supplemental Figure S4

S4A

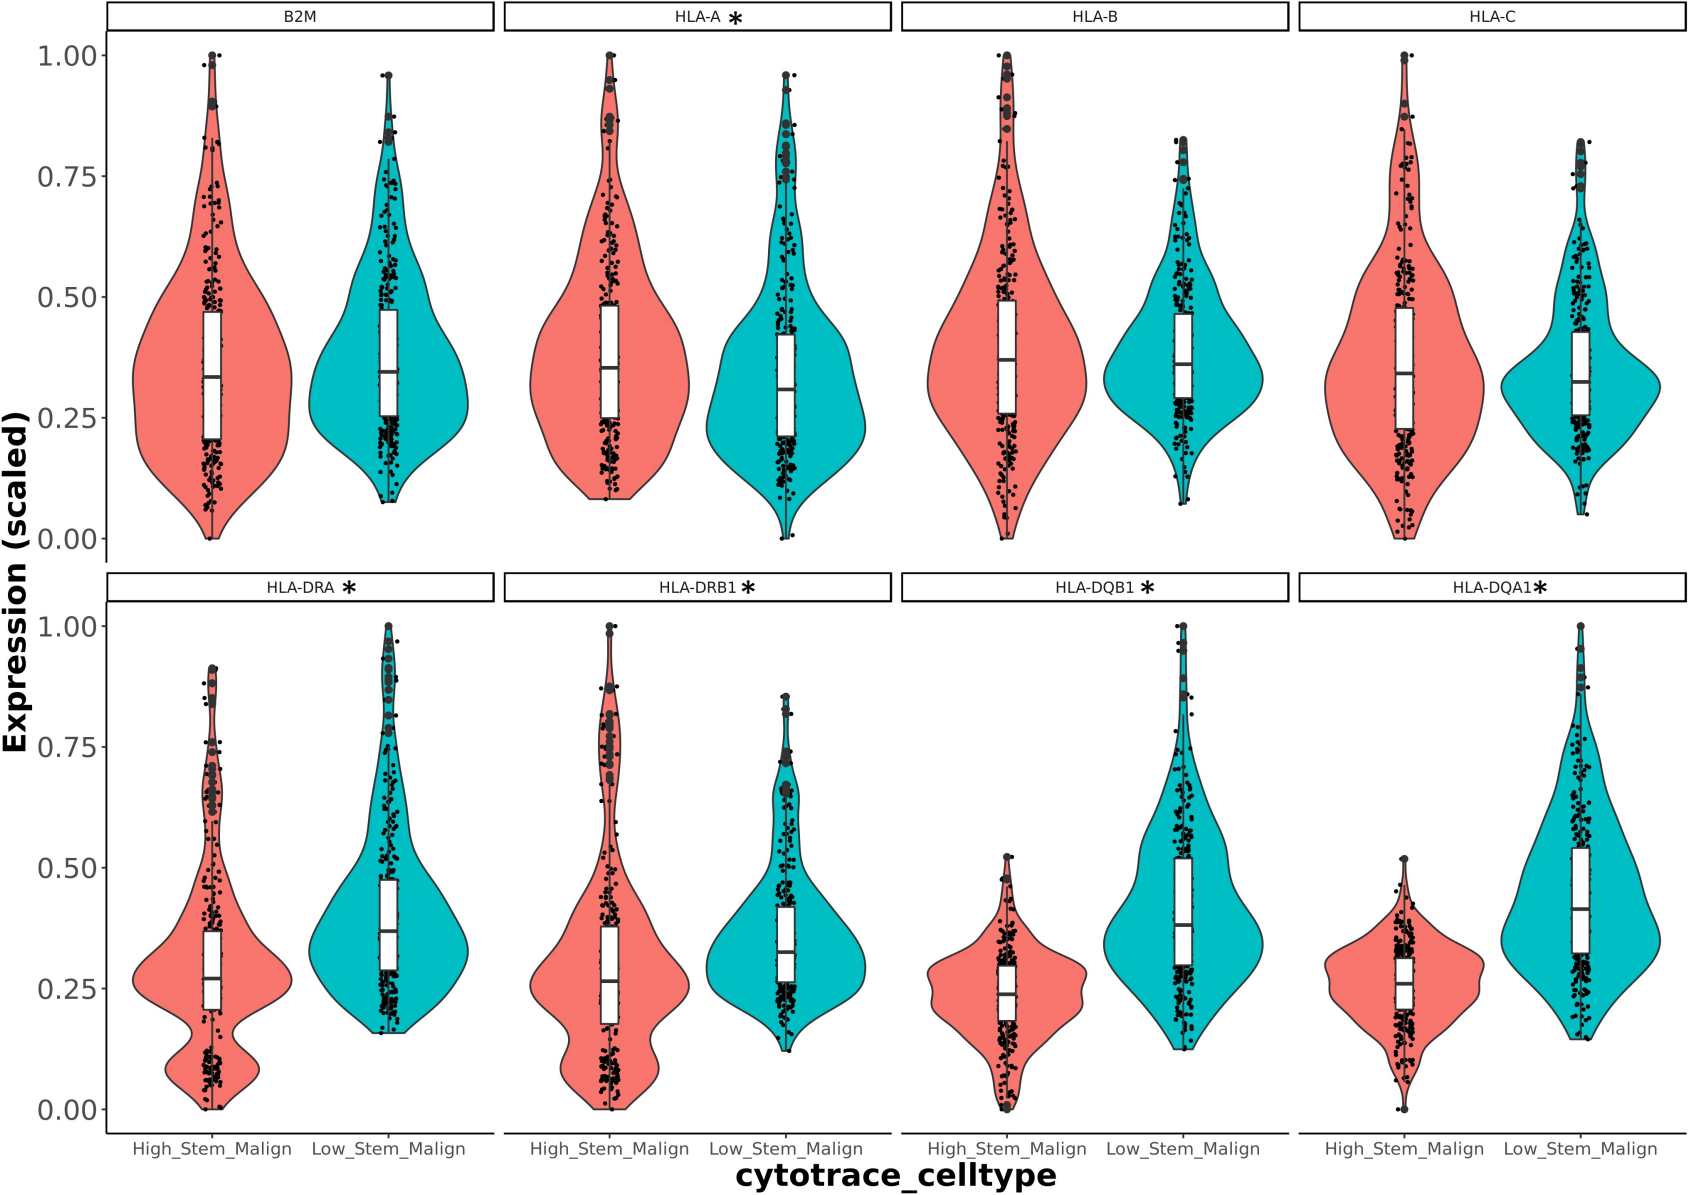

Supplemental Figure S4

S4B

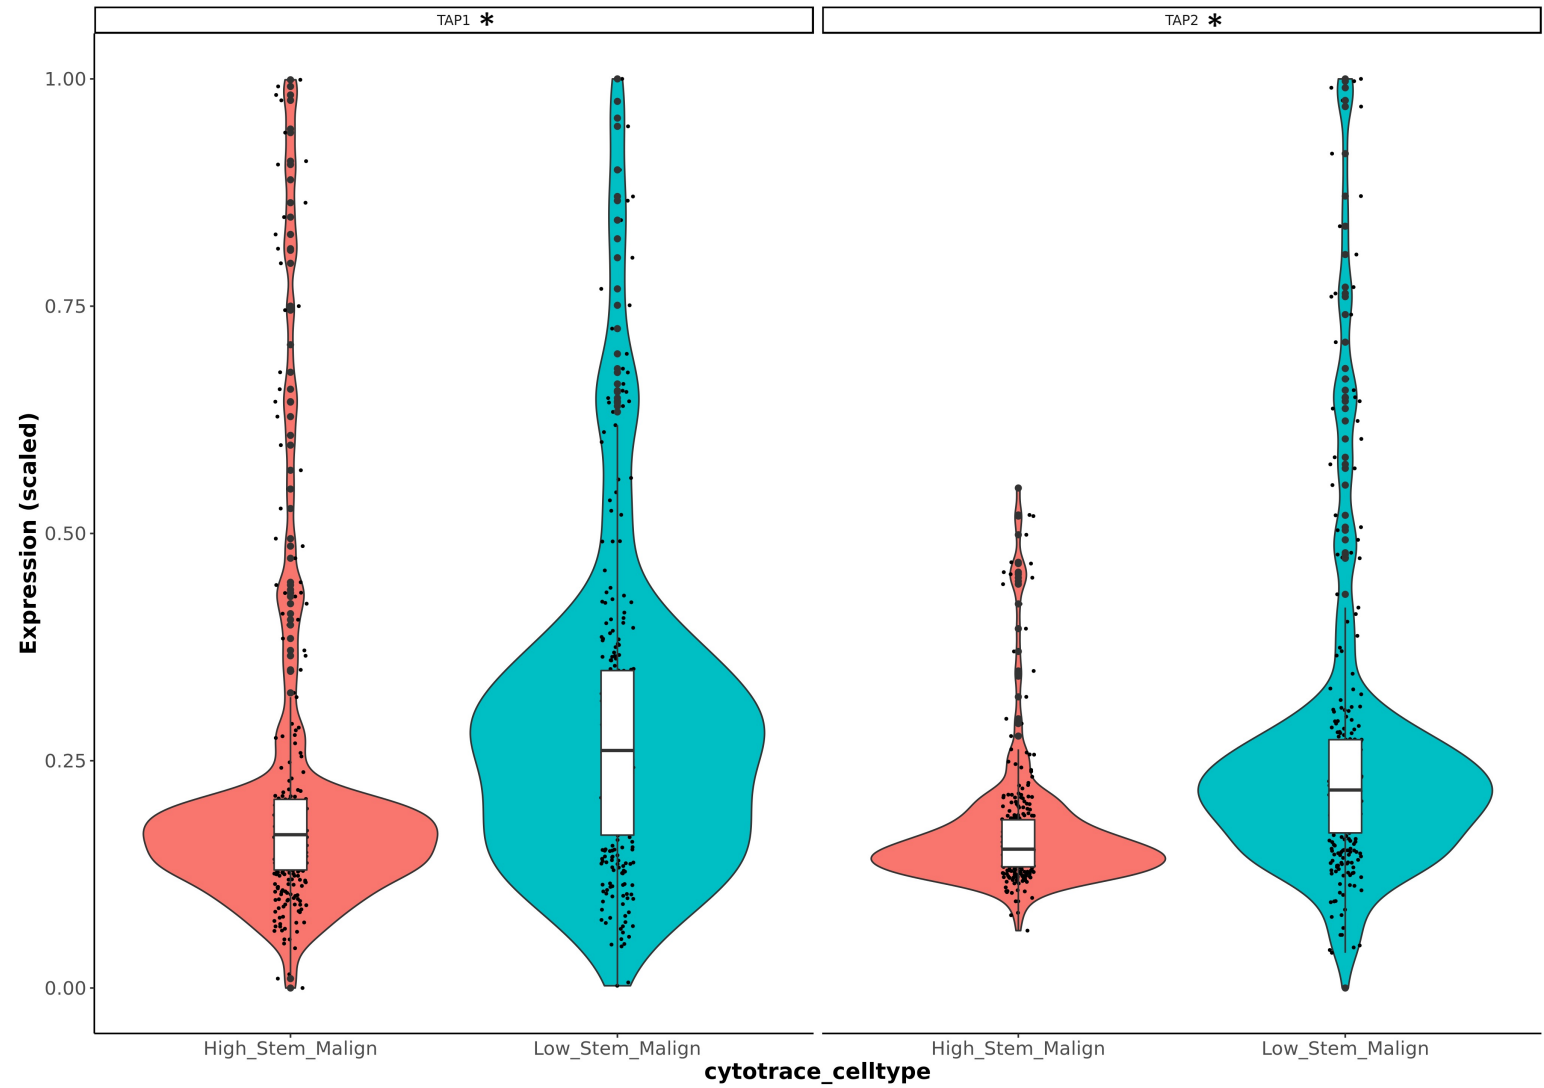

Supplemental Figure S5

S5A

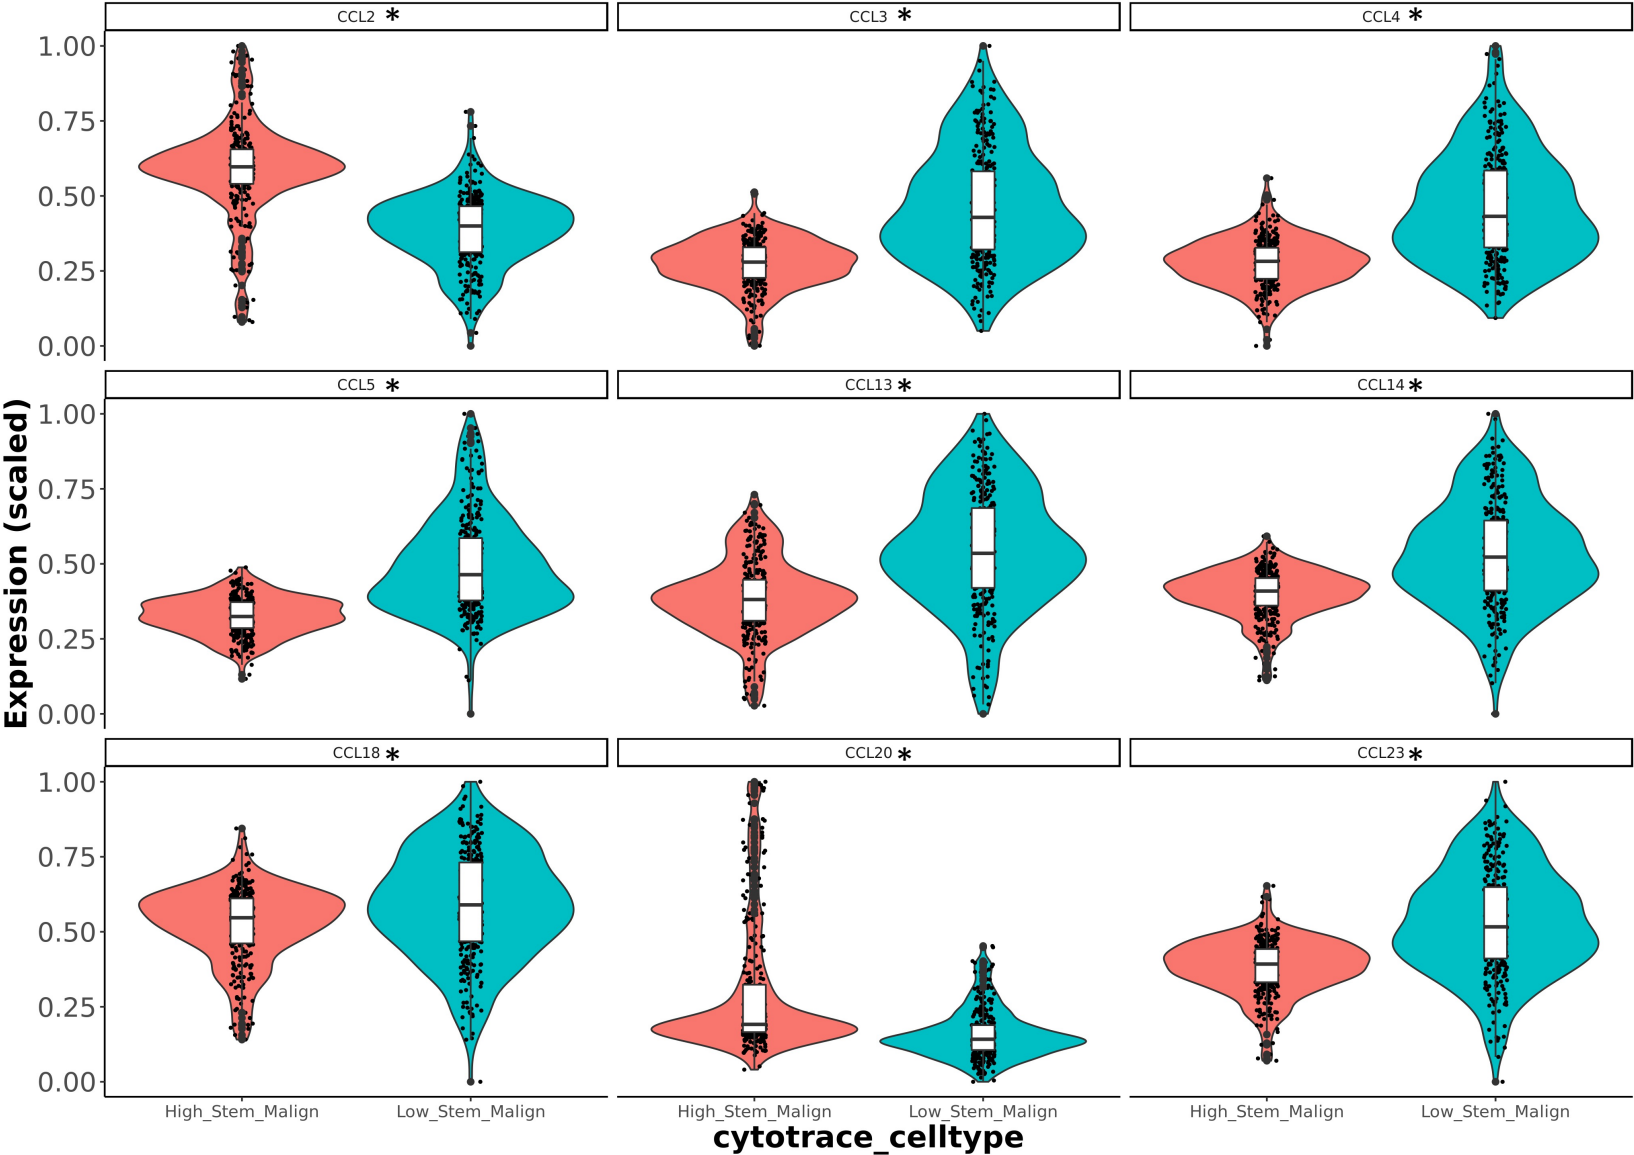

Supplemental Figure S5

S5B

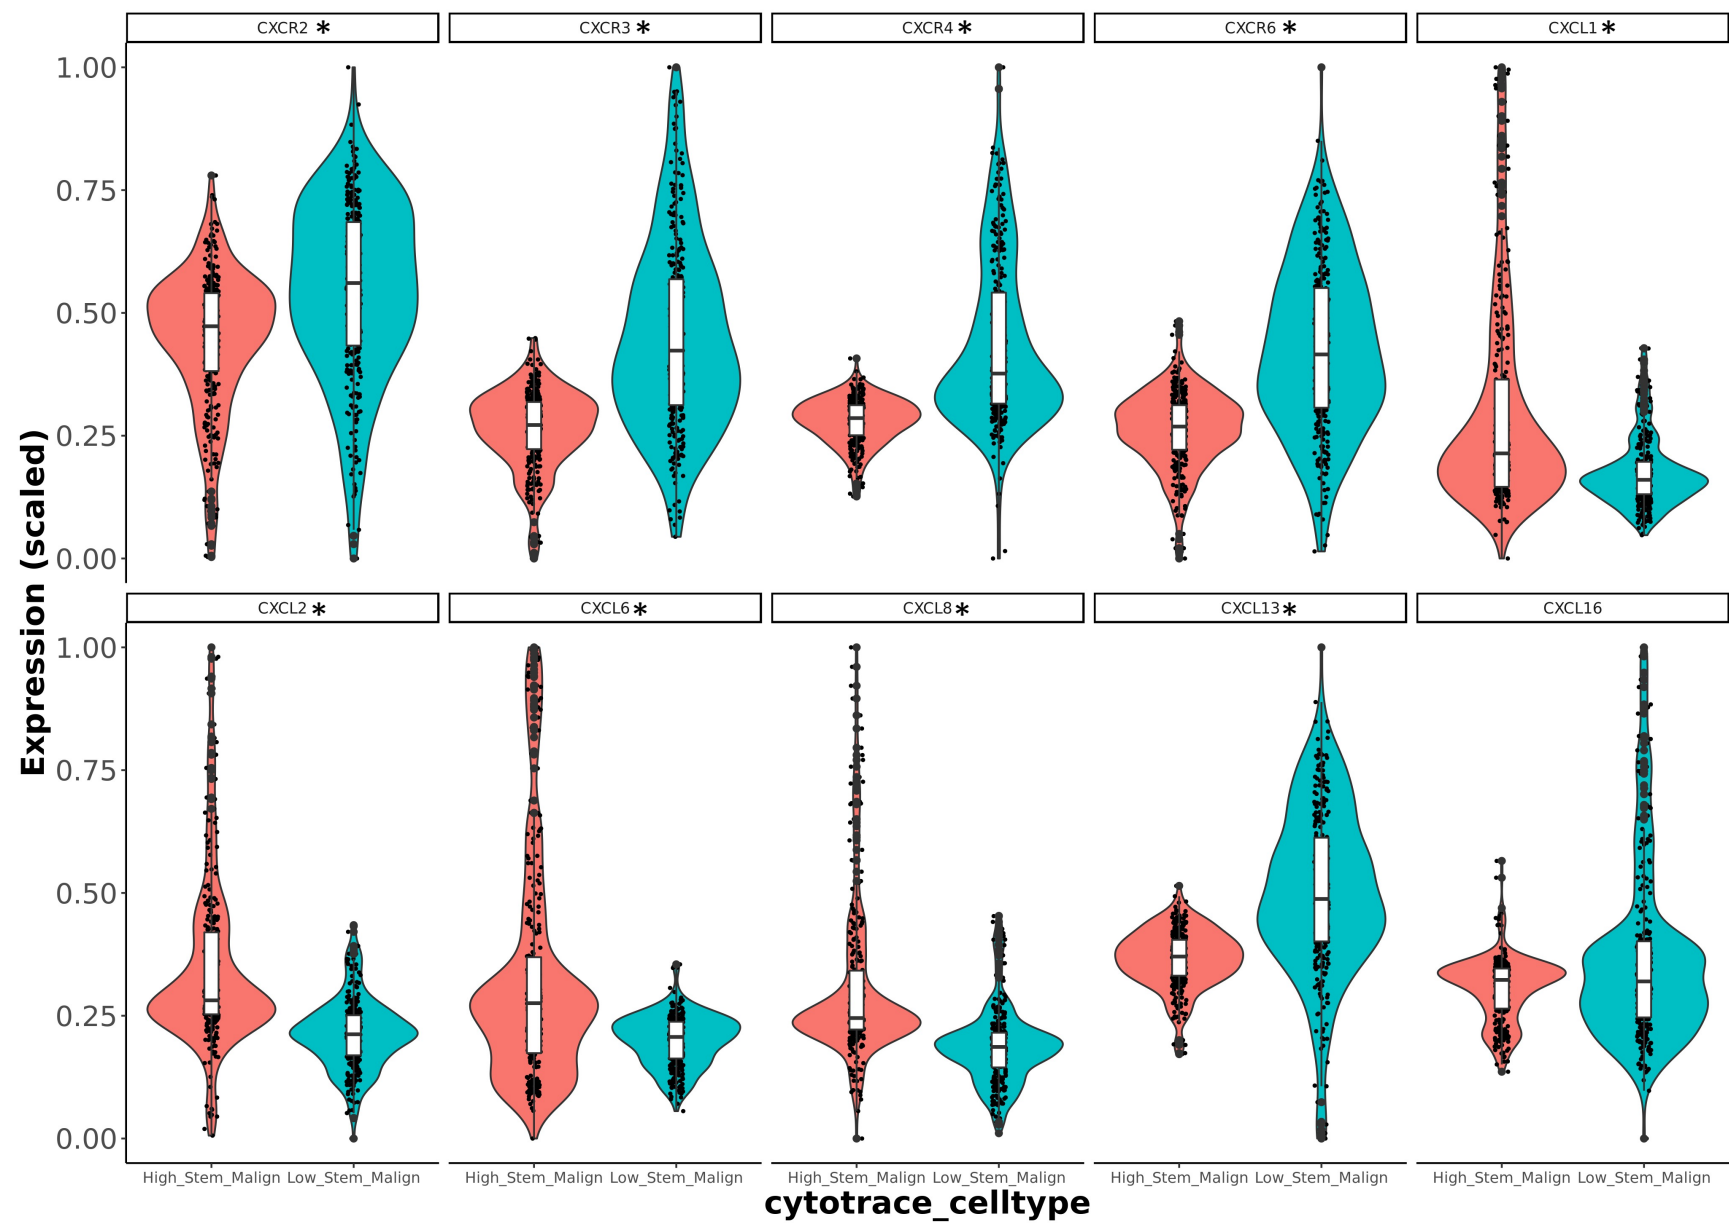

Supplemental Figure S5

S5C

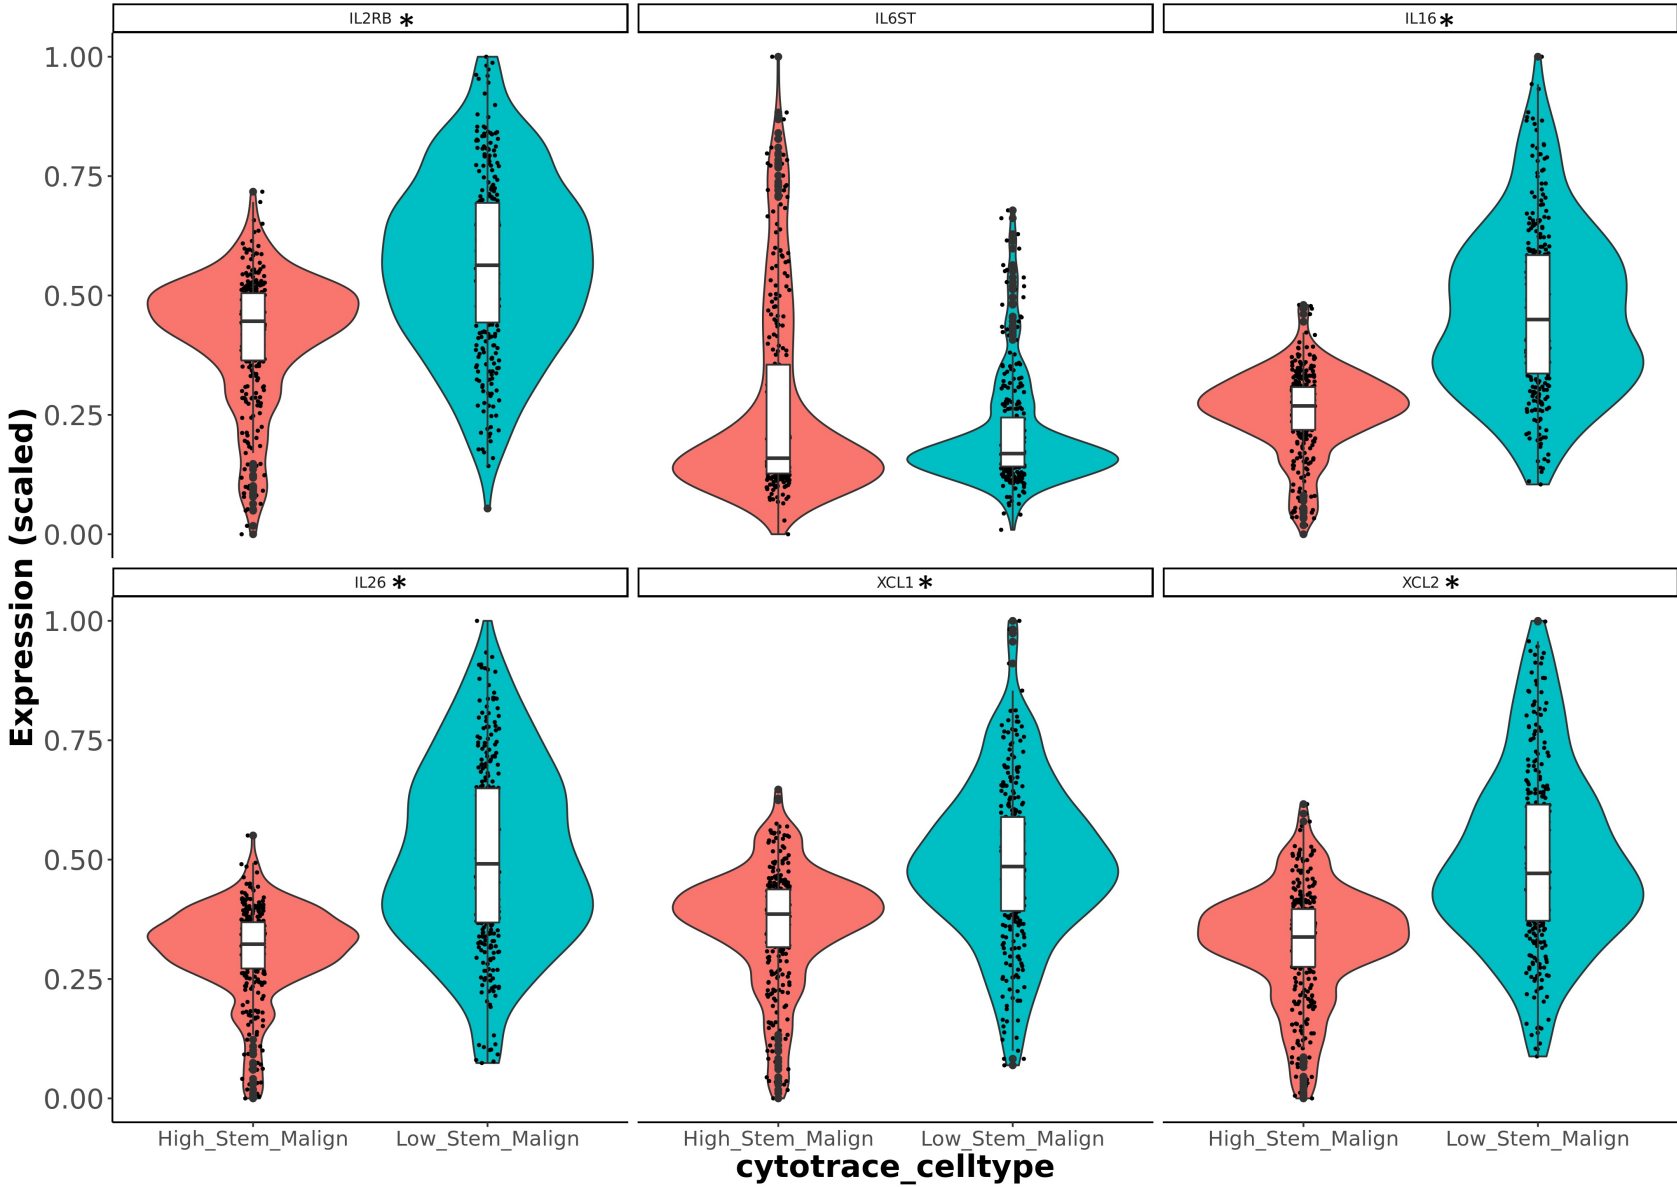



Supplemental Figure S5

S5D

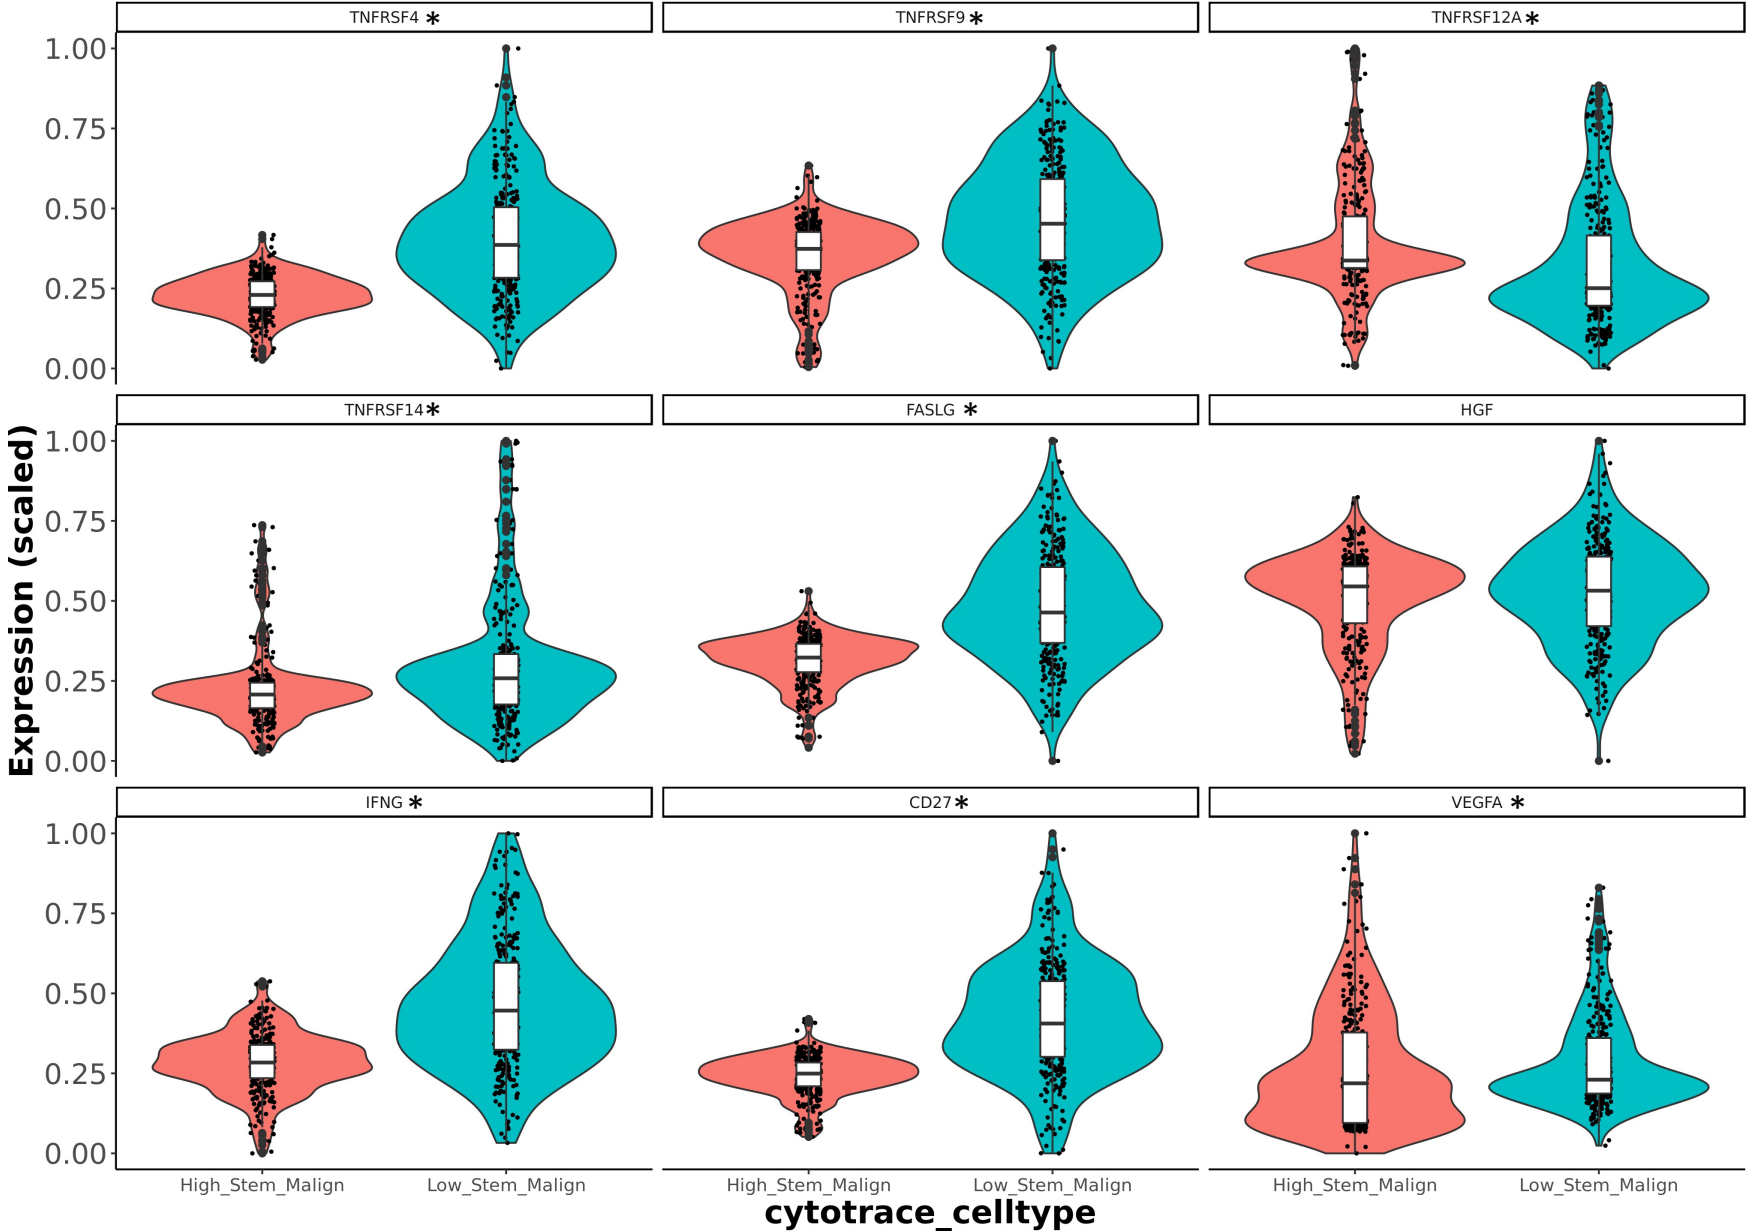

Supplement: f1 [file 3558200.f1.zip]
