# Supplementary figures and images for: Characterization of Immunogenicity of Malignant Cells with Stemness in Intrahepatic Cholangiocarcinoma by Single-Cell RNA Sequencing
Source: Hindawi journal article supplement (doi:10.1155/2022/3558200), 2022-04-29

# S4A

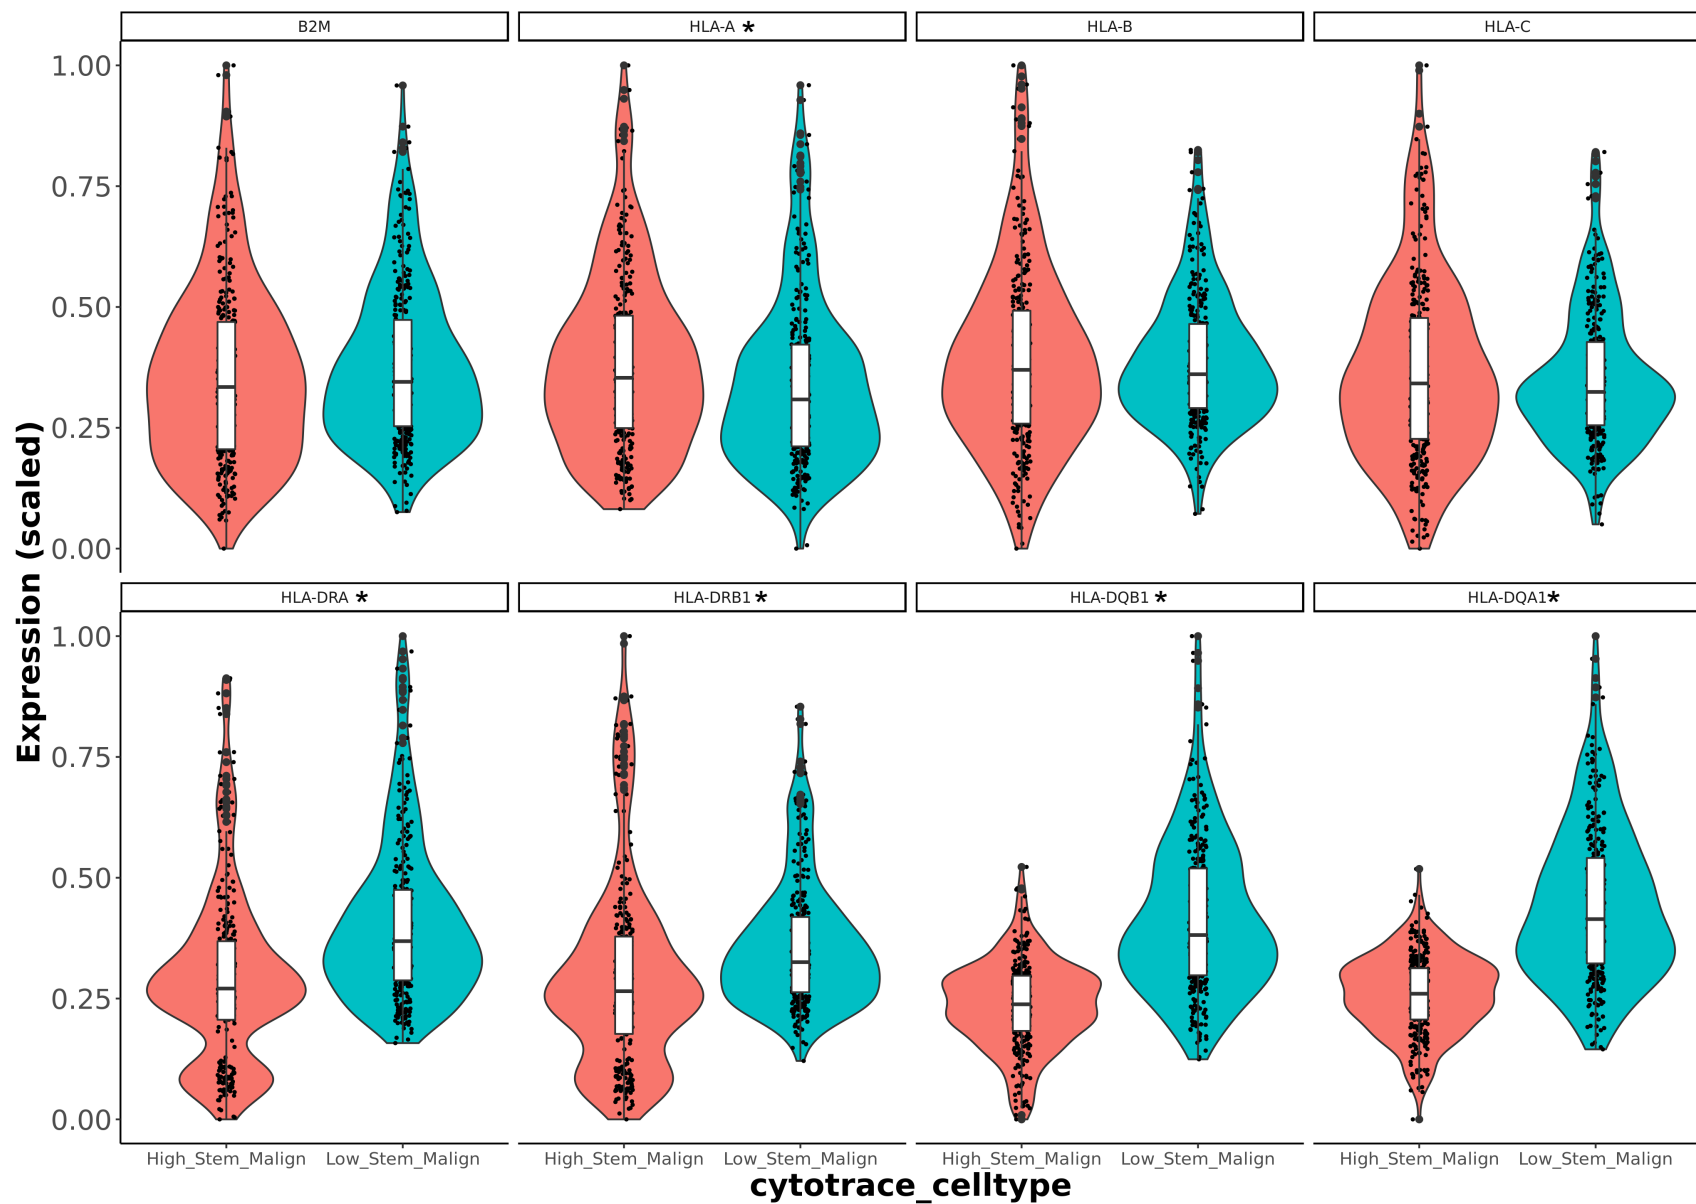

Supplement: f1 [file 3558200.f1.zip]

S2C

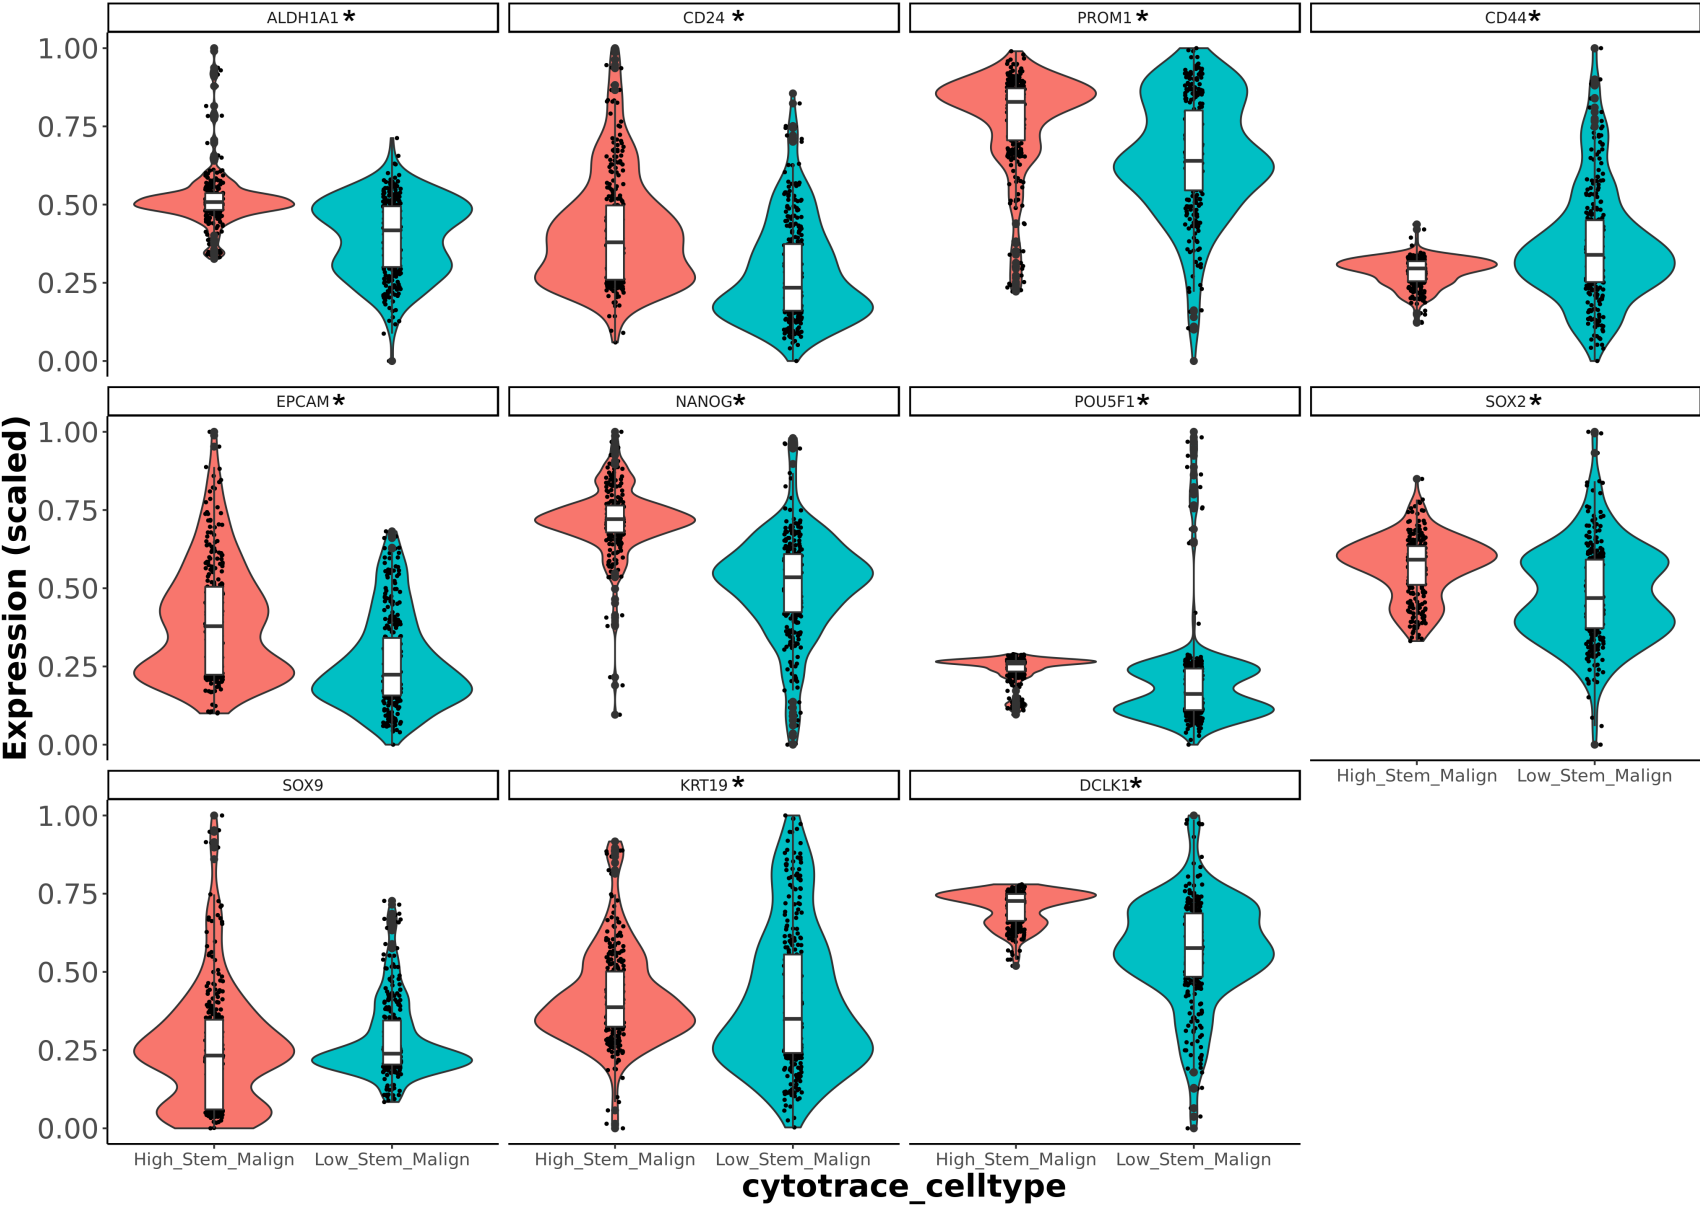

Supplement: f1 [file 3558200.f1.zip]

**S2A**

cytotrace\_celltype

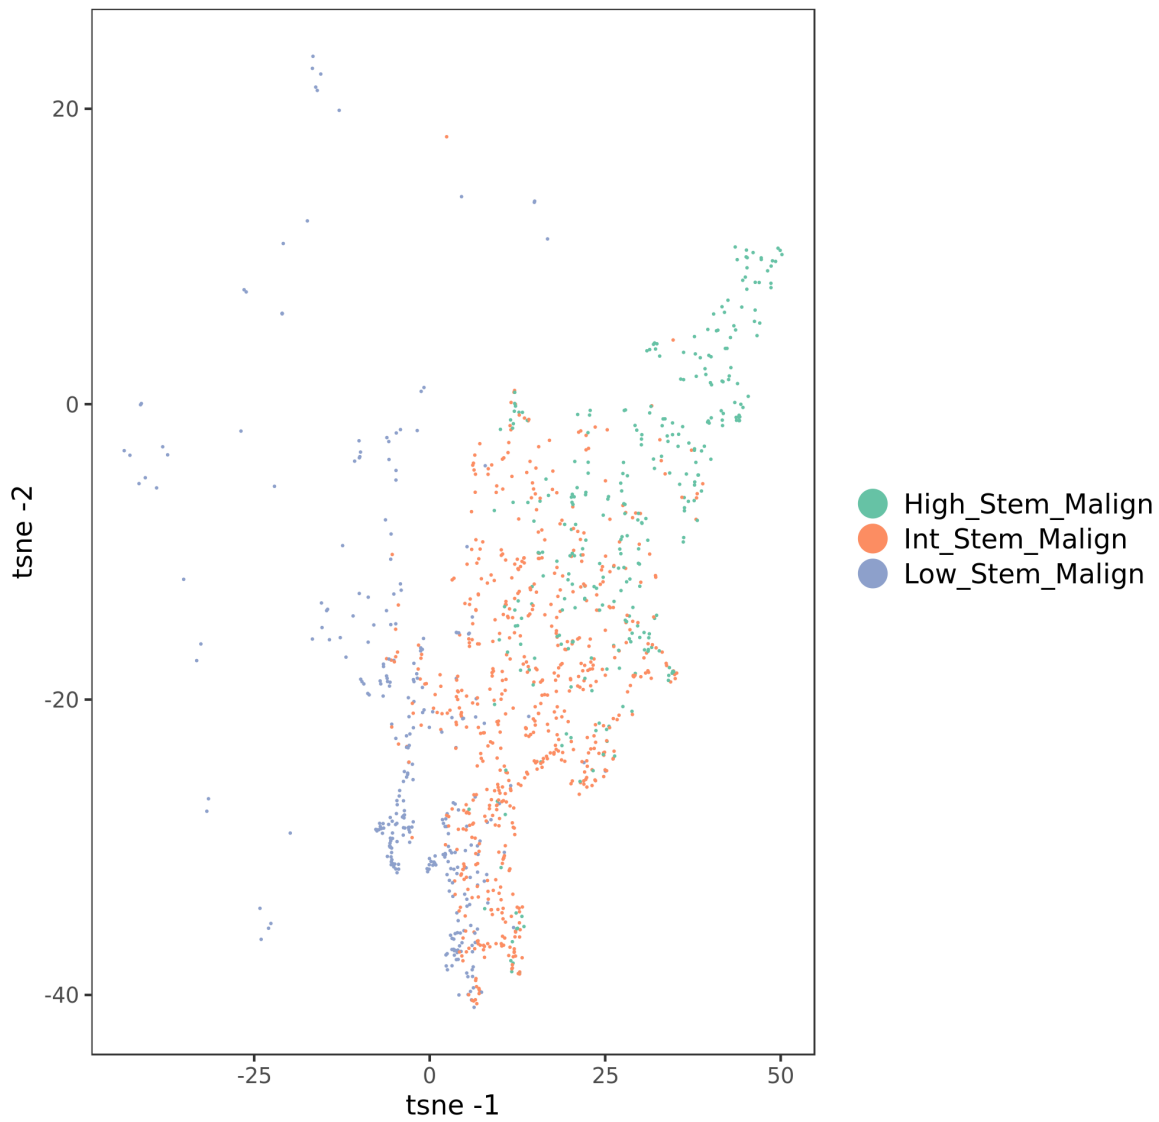

Supplement: f1 [file 3558200.f1.zip]

S5C

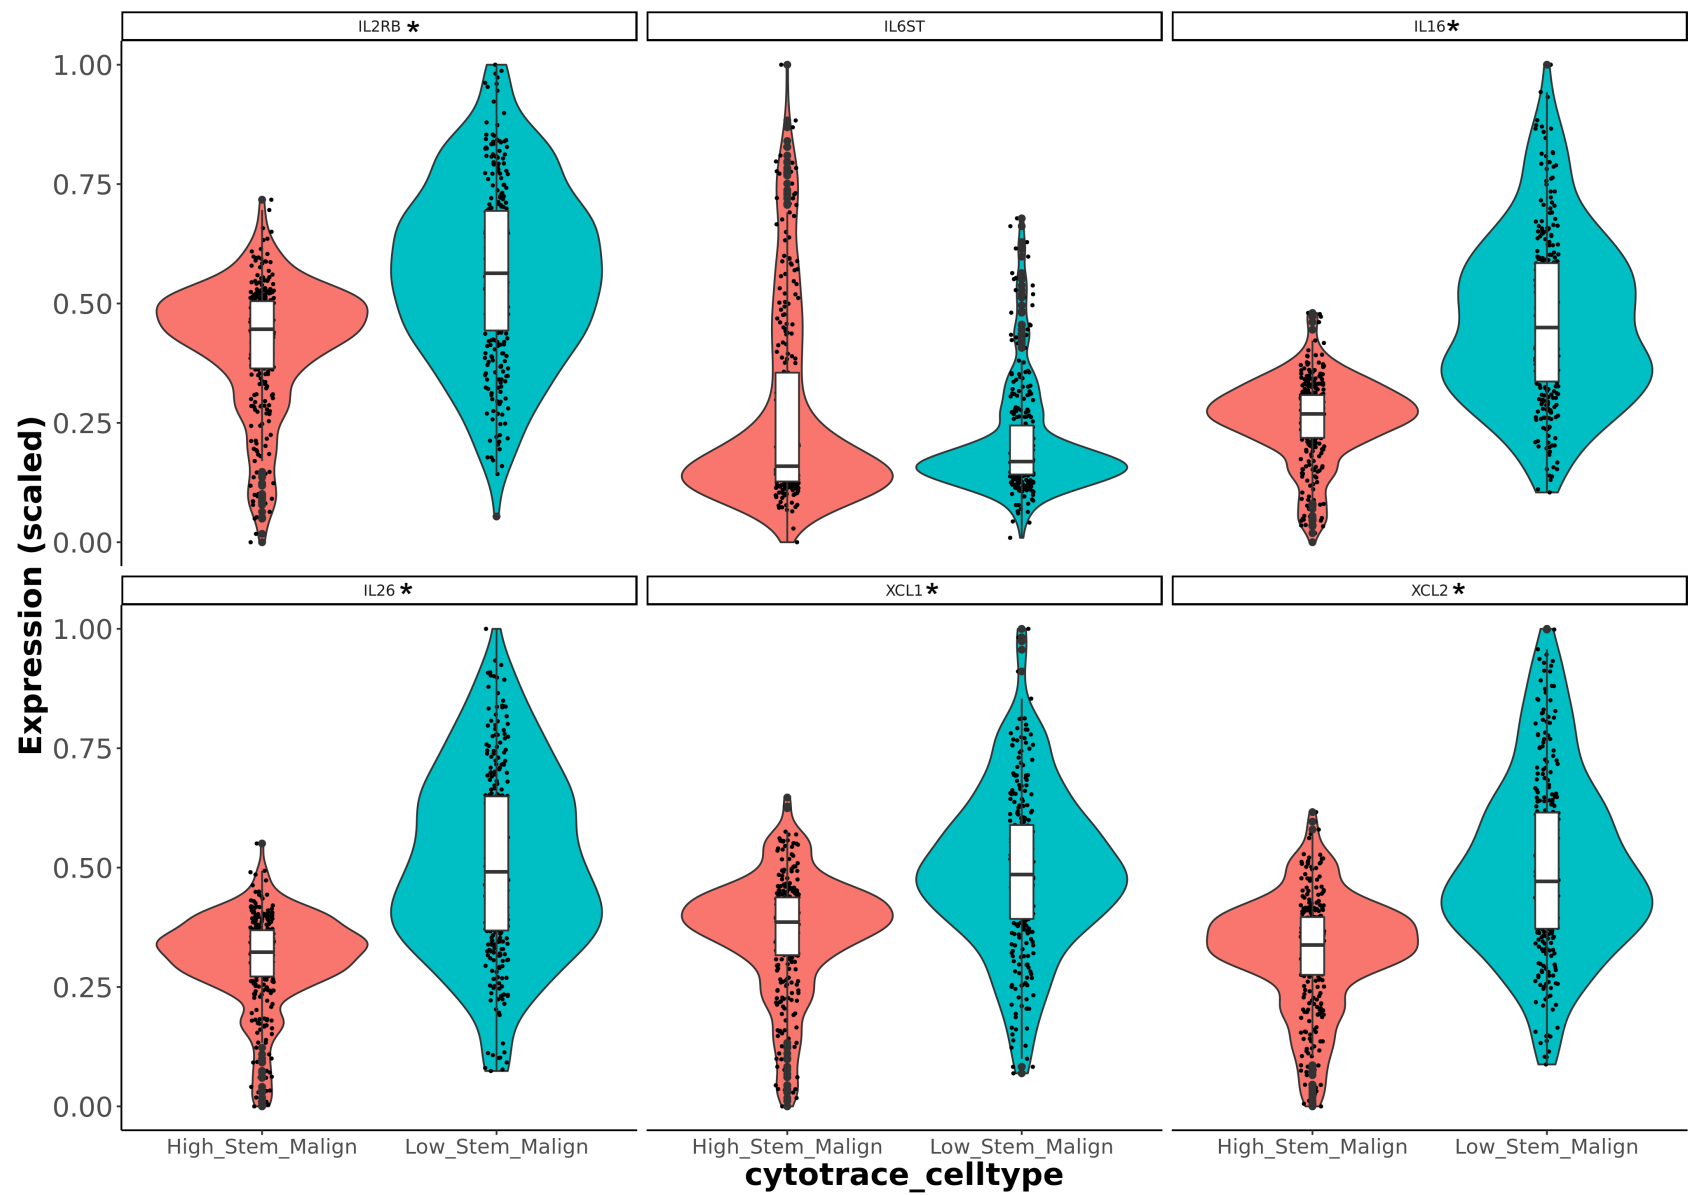

Supplement: f1 [file 3558200.f1.zip]

S5D

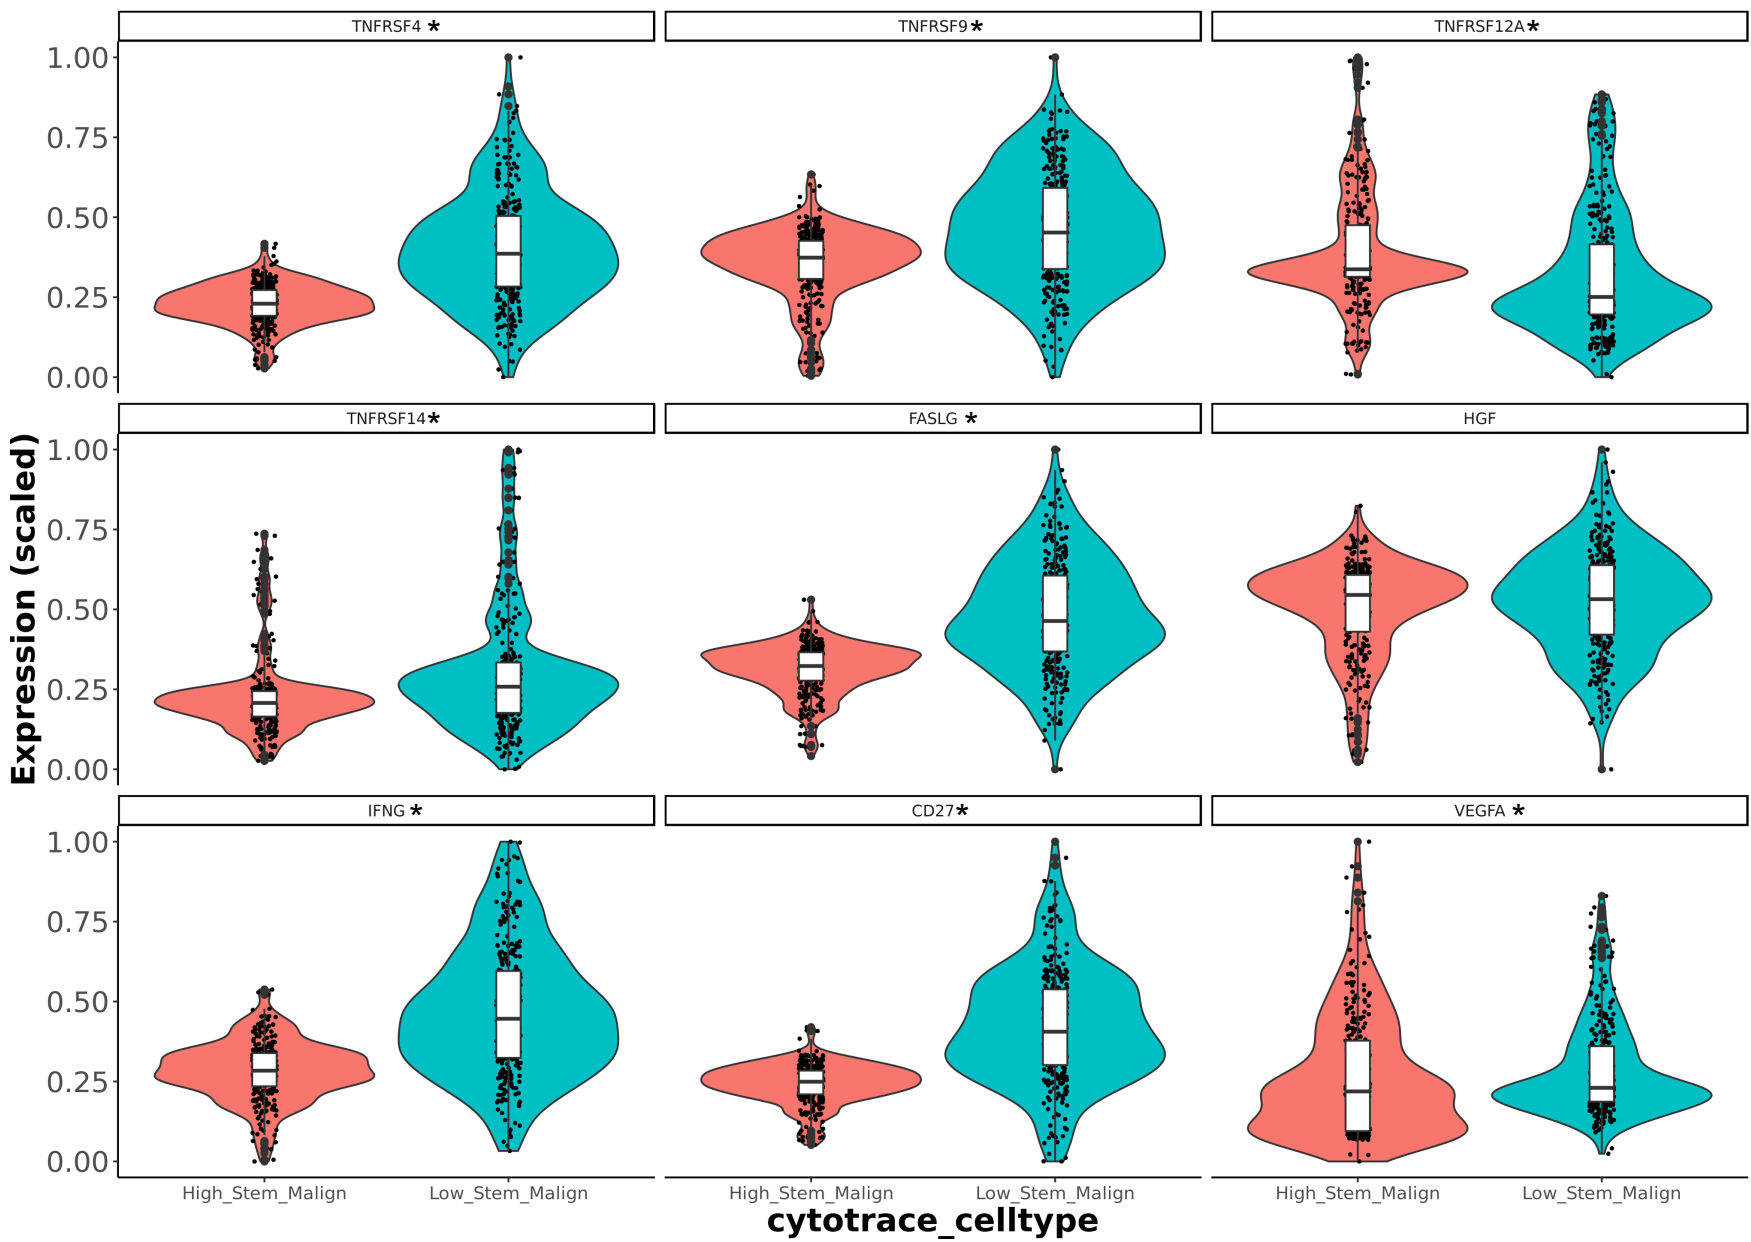

Supplement: f1 [file 3558200.f1.zip]

S5A

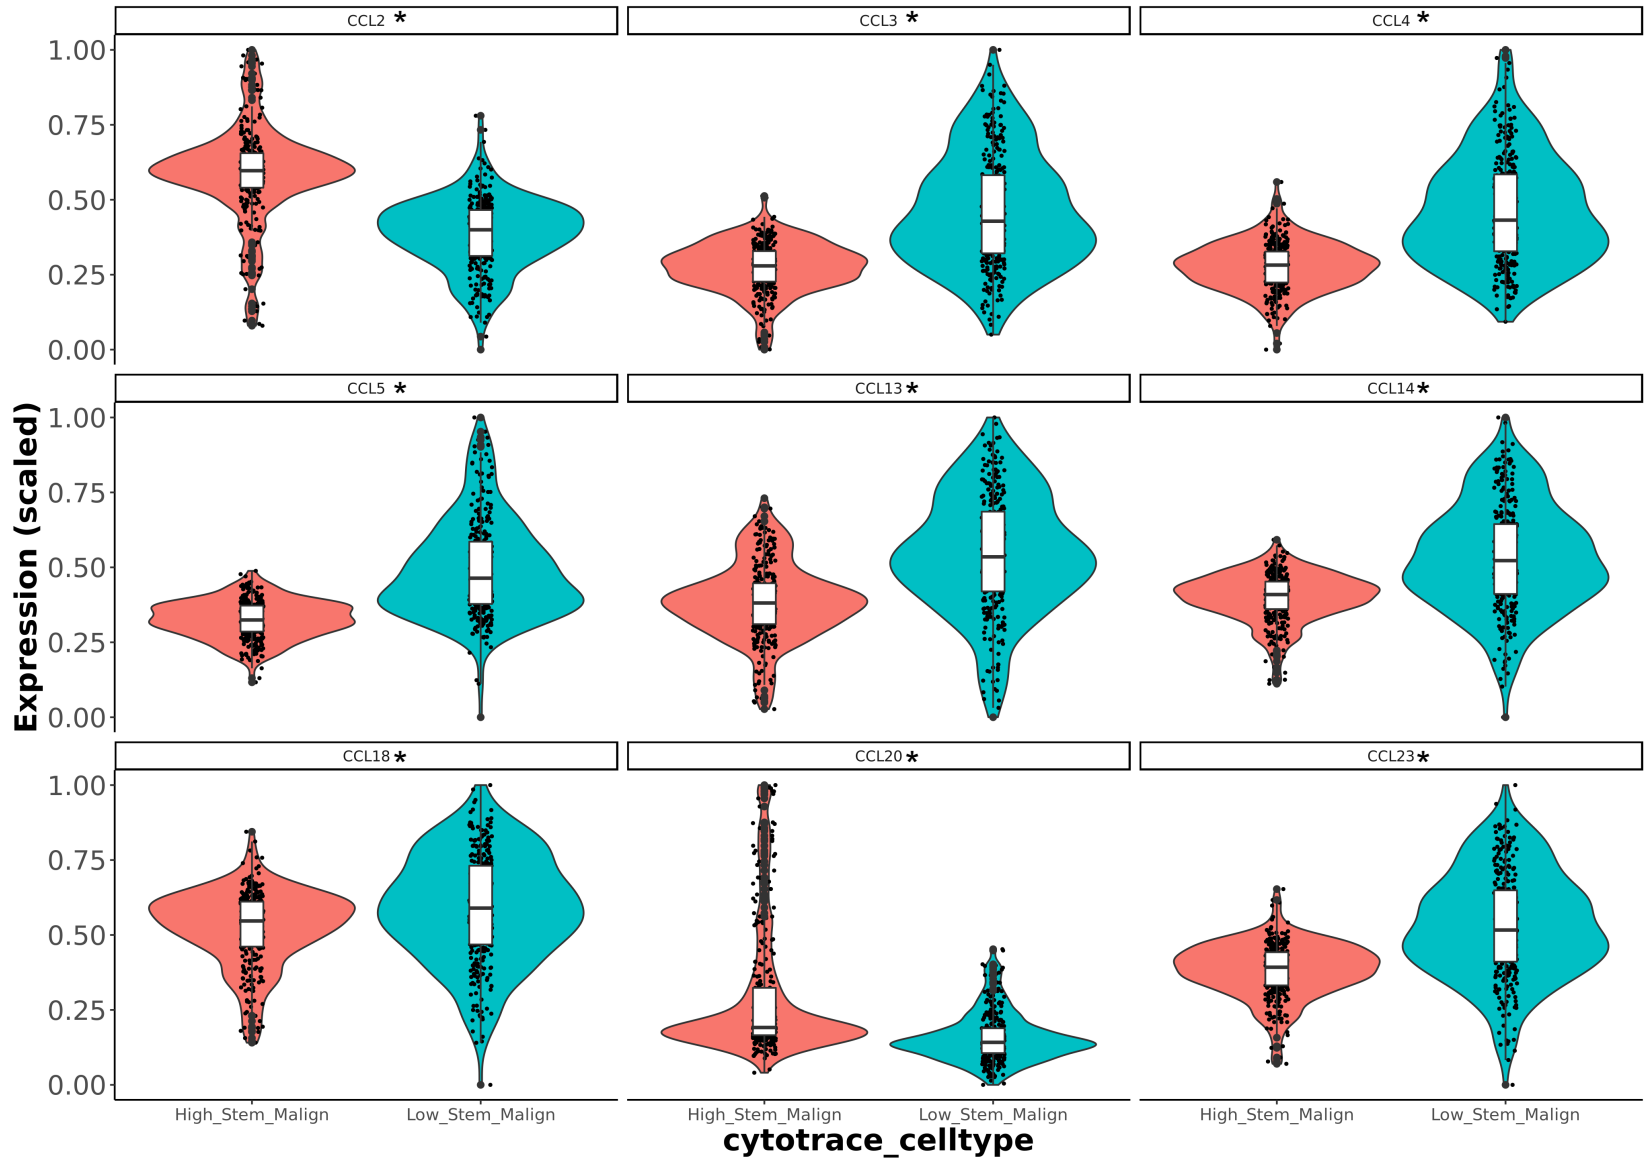

Supplement: f1 [file 3558200.f1.zip]

**A**

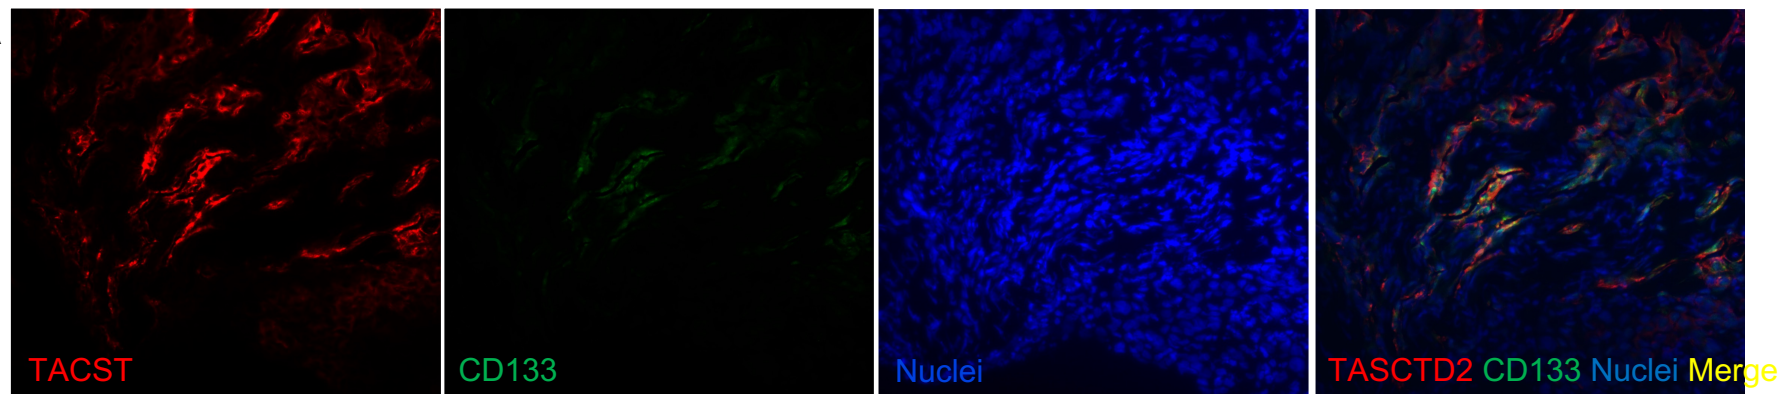

**B**

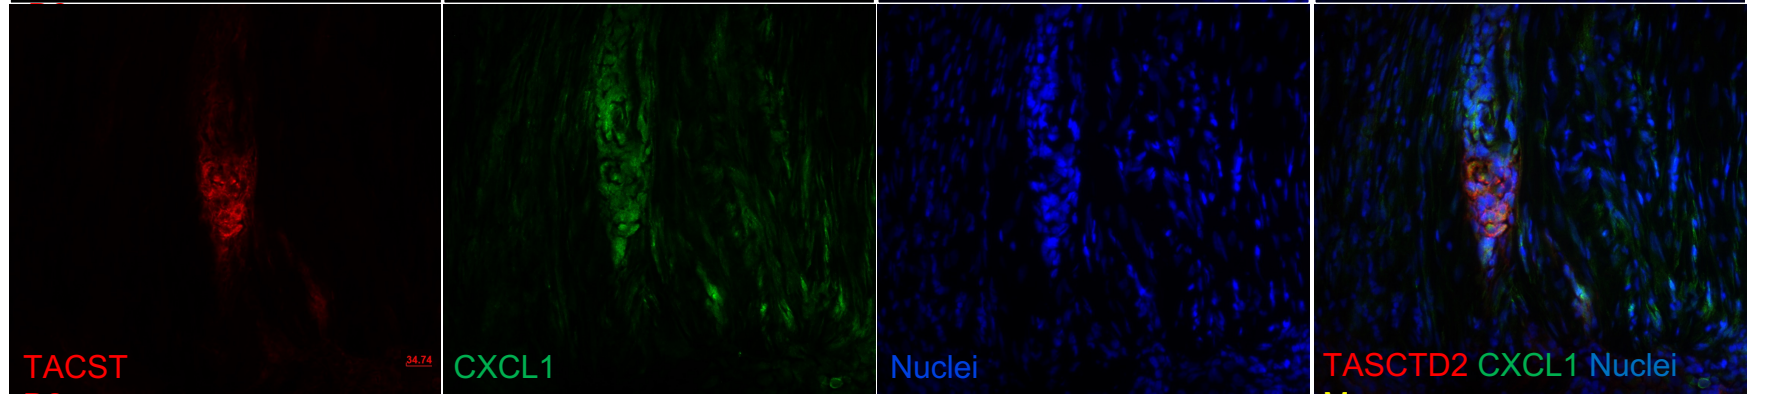

**C**

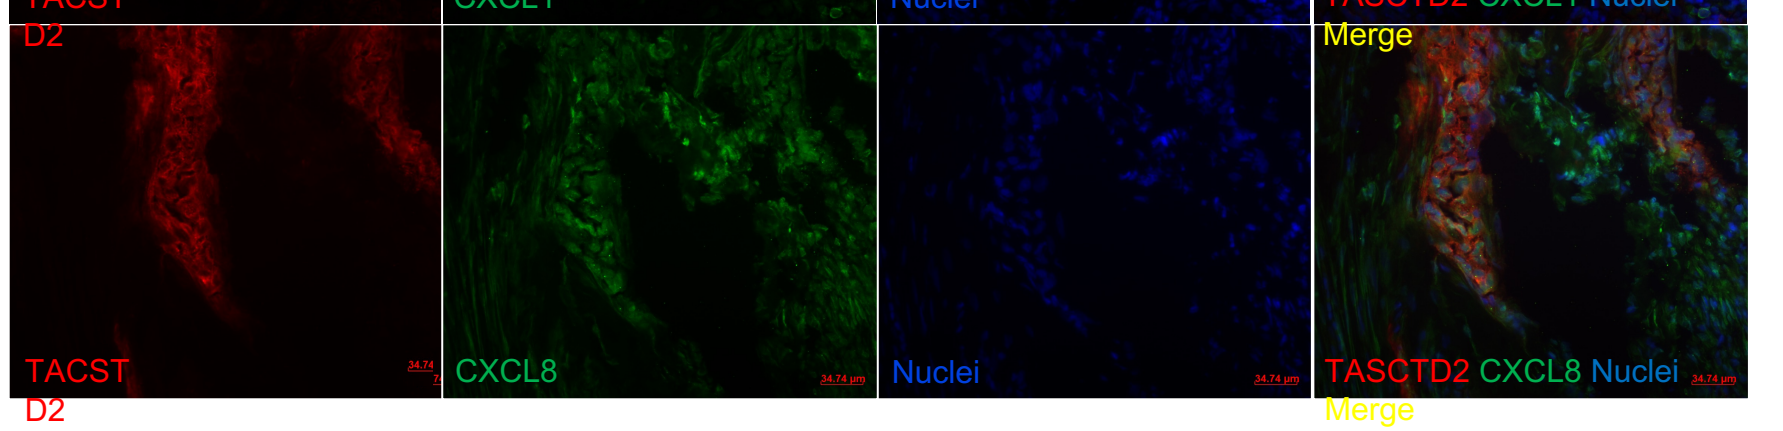

Supplement: f1 [file 3558200.f1.zip]

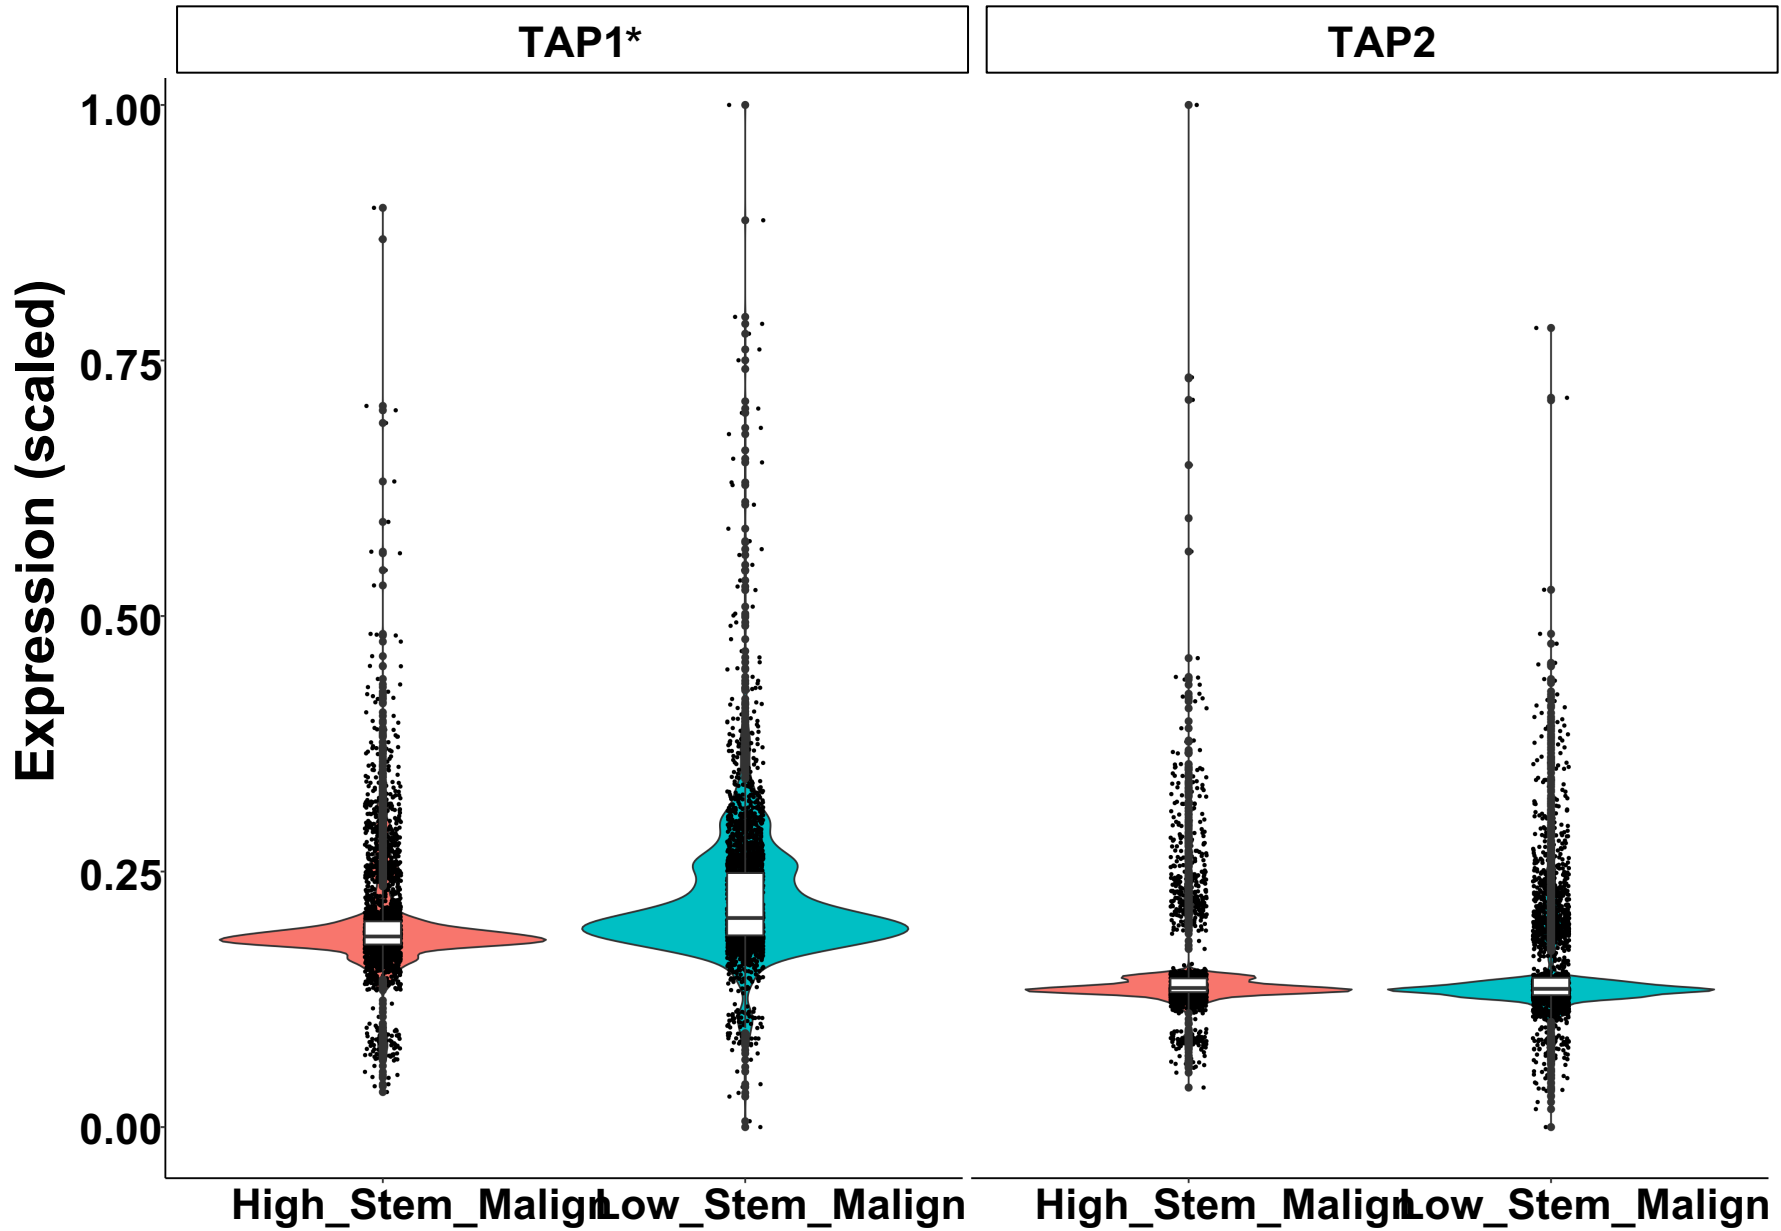

Supplement: f1 [file 3558200.f1.zip]

S4B

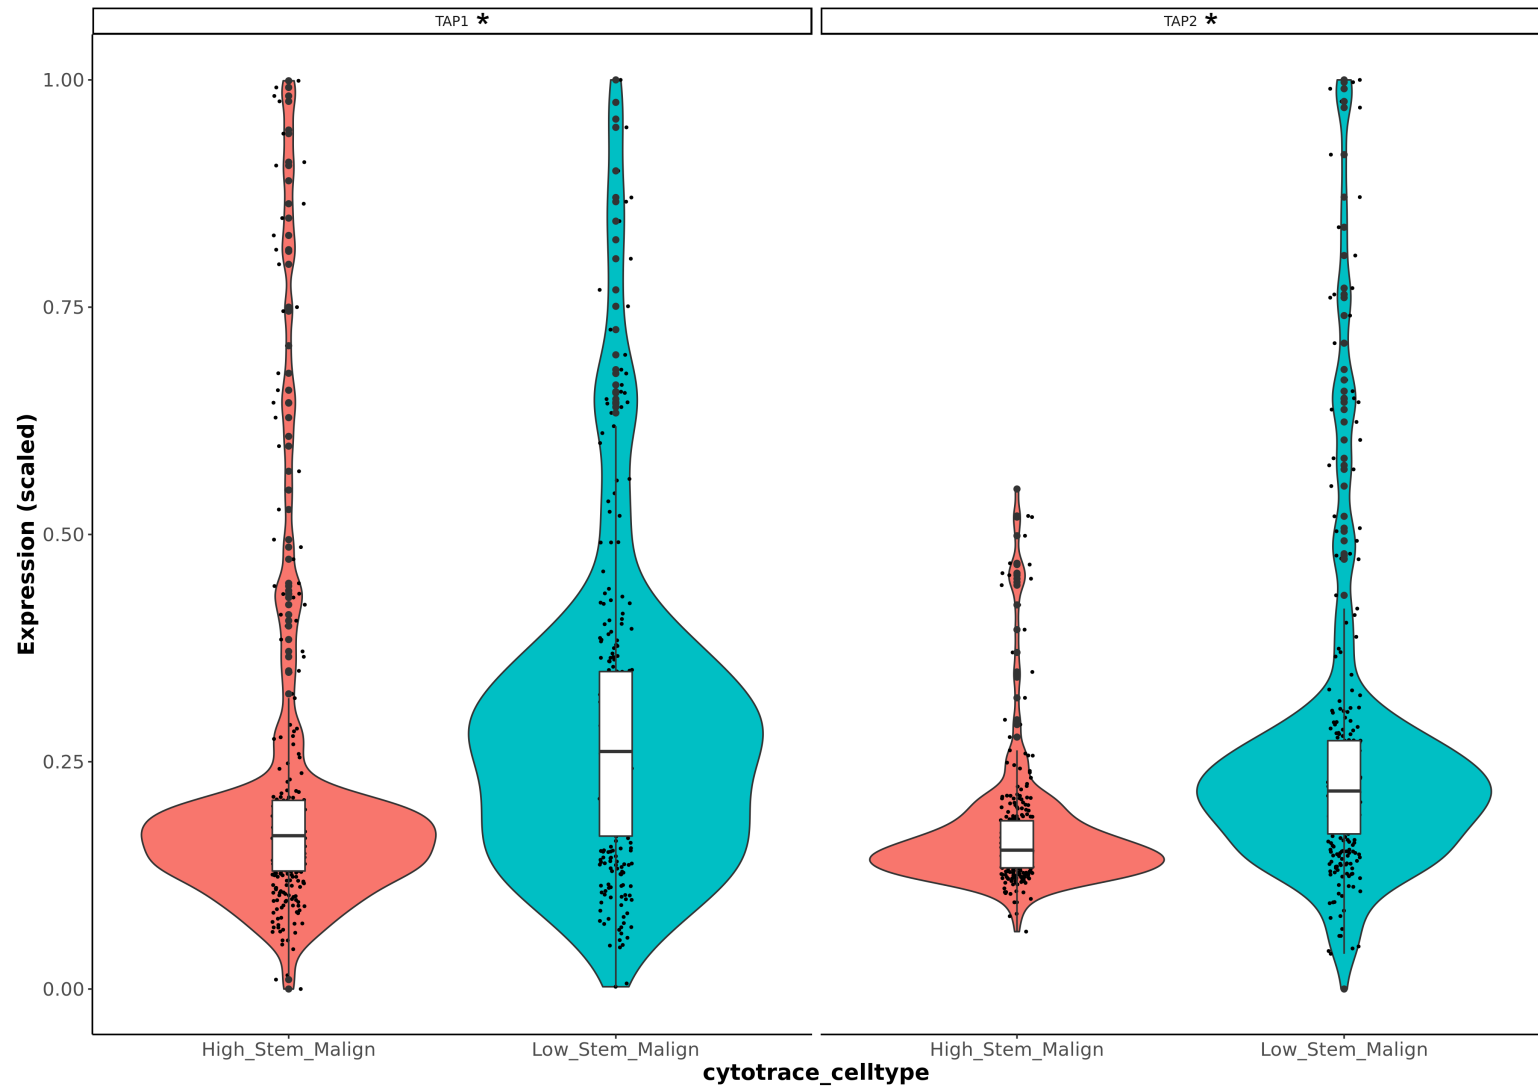

Supplement: f1 [file 3558200.f1.zip]

S5B

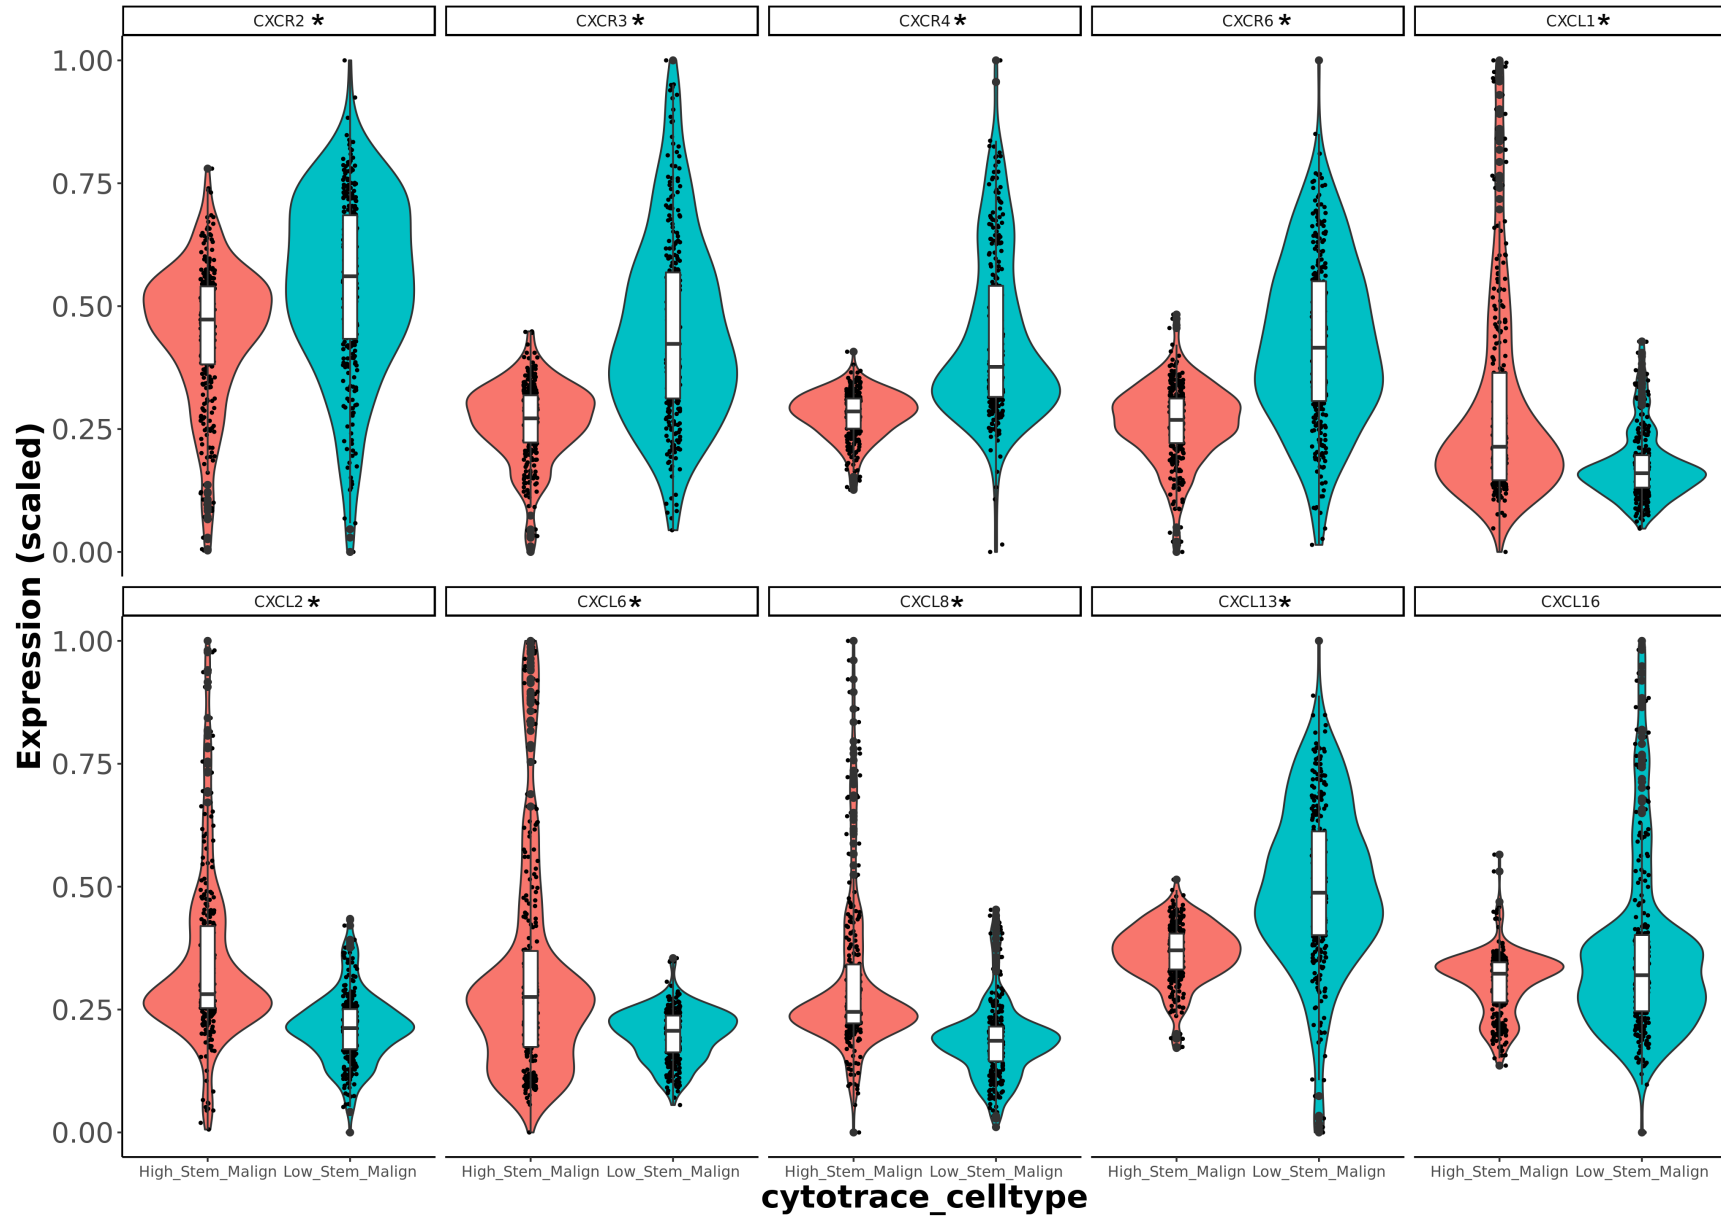

Supplement: f1 [file 3558200.f1.zip]

# S2B

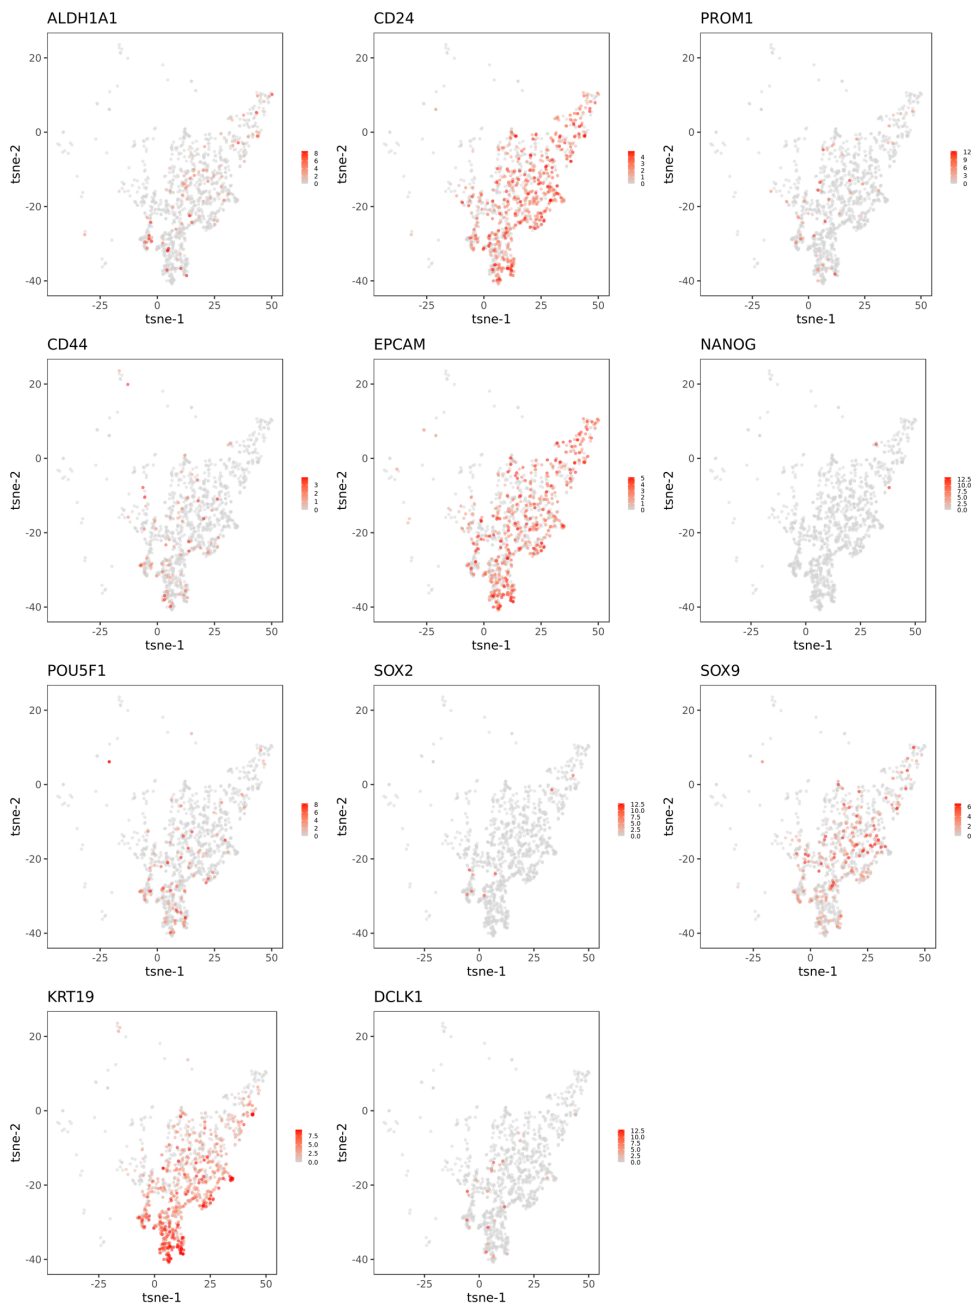

Supplement: f1 [file 3558200.f1.zip]
